# Supplementary material for: Stepwise spin-state switching in a manganese(iii) complex
Source: Royal Society of Chemistry journal article supplement (doi:10.1039/d0dt02746d), 2020-01-01
Supplement: d0dt02746d1.pdf [file d0dt02746d1.pdf]

# Stepwise Spin-State Switching in a Manganese(III) Complex

*Subrata Ghosh, Sukanya Bagchi, Mayurika Das, Sujit Kamilya and Abhishake Mondal\*<sup>†</sup>*

<sup>†</sup>*Solid State and Structural Chemistry Unit, Indian Institute of Science, Sir C V Raman Road, Bangalore  
560012, India*

Correspondence to: [mondal@iisc.ac.in](mailto:mondal@iisc.ac.in)

## Table of Content:

|                                           |    |
|-------------------------------------------|----|
| Experimental Section .....                | 4  |
| Materials and physical measurements ..... | 4  |
| Synthesis of complex .....                | 4  |
| Magnetic Measurements .....               | 6  |
| X-ray crystallography.....                | 6  |
| Spectroscopic studies .....               | 7  |
| Table.....                                | 20 |
| Reference.....                            | 35 |

## List of Figures

|                                                                                                                                                                                                                                                                       |    |
|-----------------------------------------------------------------------------------------------------------------------------------------------------------------------------------------------------------------------------------------------------------------------|----|
| <b>Fig. S1.</b> Picture of crystals for complex <b>1</b> .....                                                                                                                                                                                                        | 5  |
| <b>Fig. S2.</b> Comparison of the room temperature experimental PXRD pattern and the 240 K simulated one for <b>1</b> .....                                                                                                                                           | 7  |
| <b>Fig. S3.</b> TGA curve for <b>1</b> from 303 K to 573 K at a 10 K min <sup>-1</sup> temperature rate under N <sub>2</sub> atmosphere.....                                                                                                                          | 7  |
| <b>Fig. S4.</b> ATR spectrum of <b>1</b> at RT. ....                                                                                                                                                                                                                  | 8  |
| <b>Fig. S5.</b> UV-vis-NIR spectra of <b>1</b> in MeCN with dilute (left) and concentrated (right) solution at room temperature.....                                                                                                                                  | 8  |
| <b>Fig. S6.</b> Solid state UV-vis-NIR spectrum of <b>1</b> in KBr at room temperature. ....                                                                                                                                                                          | 9  |
| <b>Fig. S7.</b> Perspective view of unit cell in <b>1</b> at 240 K. Hydrogen atoms are omitted for clarity (Mn: Purple, C: grey, N: blue, O: red, Cl: green).....                                                                                                     | 9  |
| <b>Fig. S8.</b> Perspective view of unit cell packing along the <i>a</i> -axis in <b>1</b> at 240 K. Counter-anions and hydrogen atoms are omitted for clarity (Mn(HS), maroon, polyhedral environment). ....                                                         | 10 |
| <b>Fig. S9.</b> Perspective view of unit cell in <b>1</b> at 120 K. Hydrogen atoms are omitted for clarity (Mn: Purple, C: grey, N: blue, O: red, Cl: green).....                                                                                                     | 10 |
| <b>Fig. S10.</b> Perspective view of unit cell packing along the <i>a</i> -axis in <b>1</b> at 120 K. Counter-anions and hydrogen atoms are omitted for clarity (Mn(intermediate), violet, polyhedral environment). ....                                              | 11 |
| <b>Fig. S11.</b> Perspective view of unit cell in <b>1</b> at 100 K. Hydrogen atoms are omitted for clarity (Mn: Purple, C: grey, N: blue, O: red, Cl: green).....                                                                                                    | 11 |
| <b>Fig. S12.</b> Perspective view of unit cell packing along the <i>a</i> -axis in <b>1</b> at 100 K. Counter-anions and hydrogen atoms are omitted for clarity (Mn(LS), blue, polyhedral environment).....                                                           | 12 |
| <b>Fig. S13.</b> Top: Perspective view of a fragment of the supramolecular structure displaying several weak interactions (red lines) in <b>1</b> at 240 K. Bottom: View of N–H···C interactions forming 1D chain in <b>1</b> at 240 K.....                           | 13 |
| <b>Fig. S14.</b> Perspective view of a fragment of the supramolecular structure displaying several weak interactions (red lines) in <b>1</b> at 120 K. Bottom: View of N–H···C interactions forming 1D chain in <b>1</b> at 120 K.....                                | 14 |
| <b>Fig. S15.</b> Top: Perspective view of a fragment of the supramolecular structure displaying several weak interactions (red lines) in <b>1</b> at 100 K. Bottom: View of N–H···C interactions forming 1D chain in <b>1</b> at 100 K.....                           | 15 |
| <b>Fig. S16.</b> Field dependence of the magnetization as <i>M</i> vs <i>H</i> plots for <b>1</b> at 100 K. The solid line is best fit. ....                                                                                                                          | 15 |
| <b>Fig. S17.</b> Field dependence of the magnetization as <i>M</i> vs <i>H</i> (left) and <i>M</i> vs <i>H/T</i> (right) plots for <b>1</b> at 4 and 6 K. The solid lines are guide for the eyes. ....                                                                | 16 |
| <b>Fig. S18.</b> DSC plot of <b>1</b> shown between 180 and 140 K at a sweep rate of 5 K min <sup>-1</sup> .....                                                                                                                                                      | 16 |
| <b>Fig. S19.</b> Cyclic voltammogram for oxidation of <b>1</b> in 0.2 M ( <sup>n</sup> Bu <sub>4</sub> N)PF <sub>6</sub> /MeCN with a scan rate of 100 mV s <sup>-1</sup> . Arrow indicates the open circuit potential with the direction of the potential sweep..... | 17 |

|                                                                                                                                                                                                                                                                                 |    |
|---------------------------------------------------------------------------------------------------------------------------------------------------------------------------------------------------------------------------------------------------------------------------------|----|
| <b>Fig. S20.</b> Square wave voltammograms for <b>1</b> in 0.2 M ( <sup>n</sup> Bu <sub>4</sub> N)PF <sub>6</sub> /MeCN. Arrows indicate the open circuit potential with the direction of the potential sweep.....                                                              | 17 |
| <b>Fig. S21.</b> Differential pulse voltammograms for <b>1</b> in 0.2 M ( <sup>n</sup> Bu <sub>4</sub> N)PF <sub>6</sub> /MeCN. Arrows indicate the open circuit potential with the direction of the potential sweep. ....                                                      | 18 |
| <b>Fig. S22.</b> Cyclic voltammogram for oxidation of NaBPh <sub>4</sub> in 0.2 M ( <sup>n</sup> Bu <sub>4</sub> N)PF <sub>6</sub> /MeCN with a scan rate of 100 mV s <sup>-1</sup> . Arrow indicates the open circuit potential with the direction of the potential sweep..... | 19 |
| <b>Fig. S23.</b> Square wave voltammogram for oxidation of NaBPh <sub>4</sub> in 0.2 M ( <sup>n</sup> Bu <sub>4</sub> N)PF <sub>6</sub> /MeCN. Arrow indicates the open circuit potential with the direction of the potential sweep.....                                        | 19 |
| <b>Fig. S24.</b> Precession images from <b>1</b> in the <i>hk0</i> at 240 K (monoclinic, a), 120 K (monoclinic, b), 120 K (triclinic, c) and 100 K (monoclinic, d).....                                                                                                         | 19 |
| <br>                                                                                                                                                                                                                                                                            |    |
| <b>Table S1.</b> X-ray crystallography data for complex <b>1</b> .....                                                                                                                                                                                                          | 20 |
| <b>Table S2.</b> Selected bond distances (Å) and bond angles (°) in <b>1</b> .....                                                                                                                                                                                              | 21 |
| <b>Table S3:</b> CShM analysis data for complex <b>1</b> . ....                                                                                                                                                                                                                 | 22 |
| <b>Table S4.</b> Spin crossover behaviors of [Mn(X-sal <sub>2</sub> -323)](BPh <sub>4</sub> ) (X = ligand substituent) complexes with associated Mn–N/O bond distances .....                                                                                                    | 23 |
| <b>Table S5:</b> Spin crossover behaviors of [Mn(5Cl-sal <sub>2</sub> -323)](Y) (Y = counteranion) complexes with associated Mn–N/O bond distances .....                                                                                                                        | 24 |

Appendix: Check cif files for complex **1**.

## Experimental Section

### Materials and physical measurements

All manipulations were carried out in air unless otherwise stated. Solvents were dried by standard methods and freshly distilled before to use. All chemicals were used as purchased from various chemical sources without further purification. The crystals of the complex were removed from the mother liquor and dried on filter paper to remove any adhering solvent molecules, before to measurement. The elemental analysis of C, H, and N were performed with Thermo Scientific Flash 2000 Organic Elemental Analyzer. Infrared (IR) spectra were recorded in the range of 4000 – 400  $\text{cm}^{-1}$  on Bruker Tensor 27 spectrometer. UV-vis-NIR spectra were carried out in the region of 250 – 2000 nm on a Lambda 750 UV-vis-NIR spectrometer. The UV-vis spectroscopic measurements in solution were done in quartz cuvettes with a path length of 1 cm. Solid-state measurement was carried out by taking 5% sample by weight in KBr. Thermogravimetric analysis (TGA) was done on a Mettler Toledo TGA/SDTA851 analyzer with a heating rate of 10  $\text{K min}^{-1}$  under a nitrogen atmosphere ranging from 303 to 573 K. Differential scanning calorimetry (DSC) measurements were performed using Mettler Toledo DSC 823<sup>e</sup> differential scanning calorimeter with a scan rate of 5  $\text{K min}^{-1}$  in a nitrogen atmosphere in the temperature range of 300 K to 140 K (lowest measurable temperature). Powder X-ray diffraction (PXRD) measurements were carried out on a PANalytical Empyrean diffractometer at 45 kV and 30 mA, under  $\text{Cu-K}\alpha$  radiation ( $\lambda = 1.54059 \text{ \AA}$ ). PXRD data analyses were done using PANalytical X'Pert HighScore Plus software.<sup>1</sup> Electrochemistry experiments (cyclic voltammetry (CV), square wave voltammetry (SWV) and differential pulse voltammetry (DPV) measurements were performed with a Metrohm Autolab PGSTAT101 using platinum as working electrode with the sample (~1 mM) in acetonitrile with 0.2 M ( $^n\text{Bu}_4\text{N}$ )PF<sub>6</sub> as supporting electrolyte. Ferrocene was used as an internal reference.

### Synthesis of complex

**[Mn(5Cl-sal<sub>2</sub>-323)](BPh<sub>4</sub>) (1).** Under an aerobic environment, a solution of 5-chloro-2-hydroxybenzaldehyde (31.2 mg, 0.2 mmol) in a mixture of ethanol and acetonitrile (1:1, 5 mL) was added to a stirred solution of N,N'- bis(3-aminopropyl)ethylenediamine (17.4 mg, 0.1 mmol)

in same solvents mixture (5 mL). The reaction mixture was stirred for 10 min to obtain a bright yellow solution. Then, a solution of manganese(II) chloride tetrahydrate (19.8 mg, 0.1 mmol) in ethanol/MeCN (1:1, 5 mL) was added; the solution color changed from yellow to deep brown indicating the aerobic oxidation of Mn(II) to Mn(III), and the reaction mixture was stirred for another 10 min. A solution of sodium tetraphenylborate (34.5 mg, 0.1 mmol) in ethanol/MeCN (1:1, 5 mL) was added and the reaction mixture was stirred for 2 h. After filtration, the brown filtrate was kept for slow evaporation to obtain analytically pure block shape crystals of **1** in 75% yield. Formula for **1**:  $C_{46}H_{46}BCl_2MnN_4O_2$  (MW.  $823.52 \text{ g mol}^{-1}$ ): Anal. Calcd. C 67.09, H 5.63, N 6.80; found C 67.23, H 5.89, N 6.48; ATR-IR (only intensive bands):  $\nu(\text{cm}^{-1}) = 3243, 3051, 1618, 1536, 1465, 1423, 1369, 1282, 1190, 1073, 1048, 979, 889, 861, 828, 803, 751, 733, 703, 666, 611, 583, 557, 488, 457, 447$ .

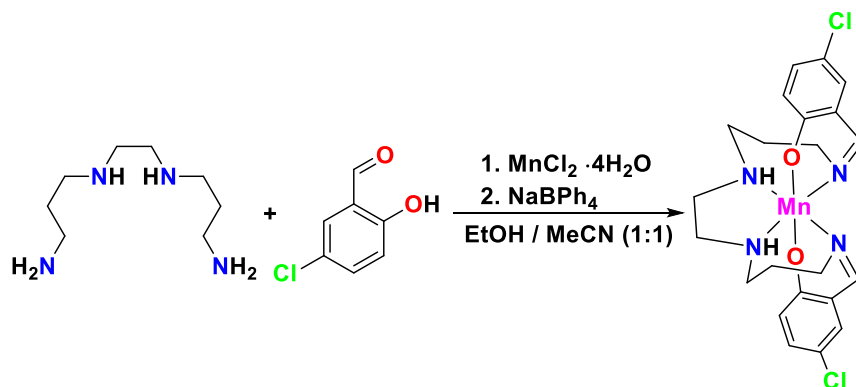

**Scheme 1.** Synthetic scheme for **1**.

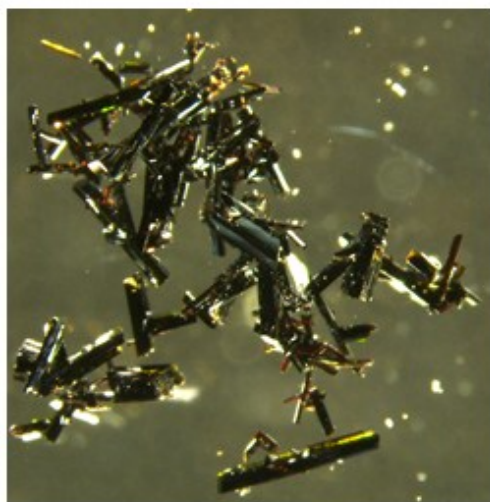

**Fig. S1.** Picture of crystals for complex **1**.

## Magnetic Measurements

The magnetic susceptibility measurements were carried out with Quantum Design MPMS-XL EverCool SQUID magnetometer, between 2 and 300 K for dc applied fields ranging from -5 T to 5 T for **1**. Polycrystalline sample of **1** (25.67 mg) introduced in a polyethylene bag ( $2.8 \times 0.75 \times 0.02$  cm) were subjected to measurements. The temperature dependent data were measured using 10000 Oe dc field. The isothermal magnetization data were acquired at 4 and 6 K.  $M$  vs  $H$  measurements were performed at 100 K to check for the presence of ferromagnetic impurities which were found to be absent. The magnetic data were corrected for the sample holder and the diamagnetic contribution.

## X-ray crystallography

Single crystal X-ray structure analyses data of the complex **1** were collected with a Bruker SMART APEX CCD diffractometer equipped with graphite monochromated MoK $\alpha$  radiation ( $\lambda = 0.71073$  Å). The single crystal was mounted on crystal mounting loop with the help of Paratone oil at 240 K followed by data collection. The same crystal was slowly cooled down to 120 K and 100 K with 2 K / min ramping rate, followed by data collection. Data integration and reduction were performed with the help of SAINT software and empirical absorption corrections were applied with SADABS programme.<sup>2</sup> The structures at 120 K and 240 K were solved using intrinsic phasing methods with *ShelXT*<sup>3</sup> and refined with a full-matrix least-squares method on  $F^2$  using *ShelXL-2018*<sup>4</sup> in *OLEX*<sup>2</sup> GUI.<sup>5</sup> The 100 K data was solved using charge flipping method and refined with L-M method using *OLEX*<sup>2</sup>. All non-hydrogen atoms were refined using anisotropic displacement parameters. Hydrogen atoms were labeled to ideal positions and refined isotropically. Hydrogen atoms were constrained by geometry. To handle the atomic position disorder of C atoms in the phenyl ring of BPh<sub>4</sub><sup>-</sup> counter anion, C atoms of phenyl rings were refined with a free variable associated with the occupancy. The total sum occupancy for the different parts of the same C atoms was constrained to be 1. The PART instruction has been used to constrain the equivalent atomic displacement parameter. Additionally, RIGU, SIMU and ISOR restraints have also been used for appropriate carbon atoms with anisotropic refinement in *ShelXL*.

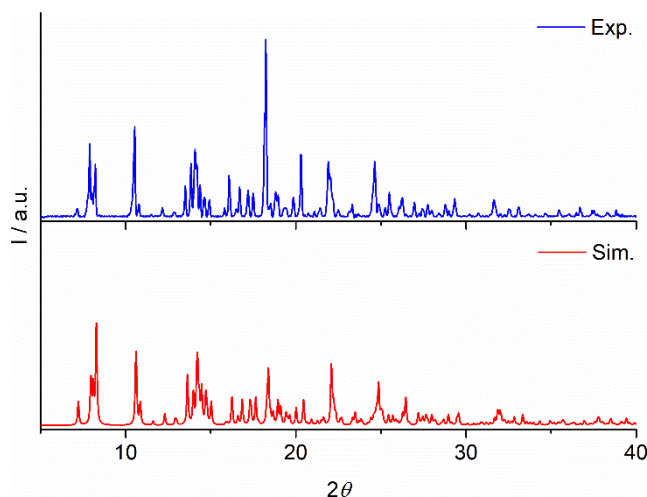

**Fig. S2.** Comparison of the room temperature experimental PXRD pattern and the 240 K simulated one for **1**.

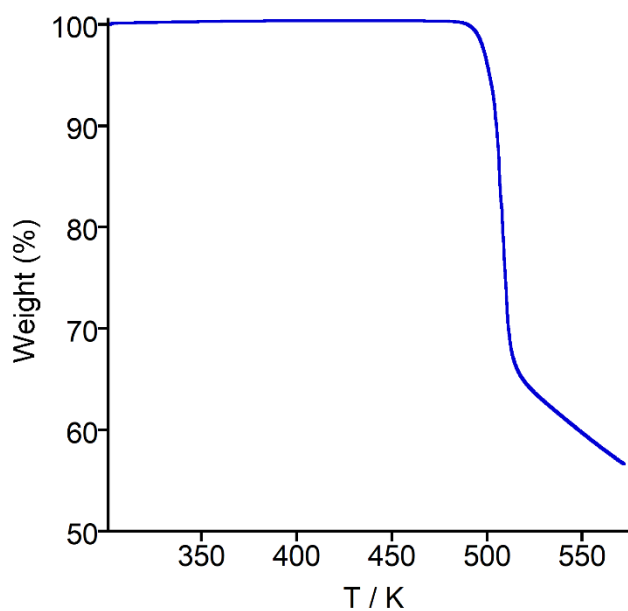

**Fig. S3.** TGA curve for **1** from 303 K to 573 K at a 10 K min<sup>-1</sup> temperature rate under N<sub>2</sub> atmosphere.

### Spectroscopic studies

Complex **1** was characterized by solid state IR spectroscopy at room temperature (Fig. S4). The IR spectrum shows characteristic C=N and N–H stretching vibrations of coordinated Schiff-base ligand at around 1618 cm<sup>-1</sup> and 3243 cm<sup>-1</sup> respectively, while the peak at around 730 and 705 cm<sup>-1</sup> suggested the presence of BPh<sub>4</sub><sup>-</sup> anion in **1**. In addition, IR spectrum displays typical absorption of coordinated Schiff-base ligand at around 1595, 1540, 1460, 1423, 1370, 1280, 1072, 1048, 860, 705 and 560 cm<sup>-1</sup>.

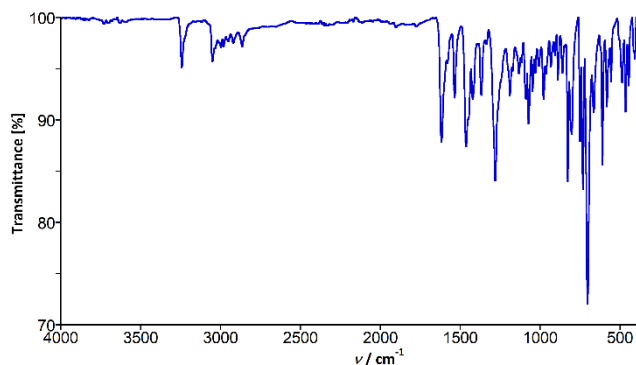

**Fig. S4.** ATR spectrum of **1** at RT.

Electronic absorption spectroscopic studies were carried out on **1** in solid-state as well as in solution at room temperature (Fig. S5 and S6). UV-vis-NIR spectra in acetonitrile exhibit one broad band along with two shoulders at around 1100 nm, 650 nm and 580 nm respectively which are attributed to  $d-d$  transitions ( ${}^5A_{1g} \rightarrow {}^5B_{1g}$ ,  ${}^5A_{1g} \rightarrow {}^5E_g$  and  ${}^5A_{1g} \rightarrow {}^5B_{2g}$ ) from HS Mn(III) ion in a tetragonally compress octahedral system. The higher molar coefficient of the later band could be explained by the tailing effect from nearby ligand-to-metal charge transfer (LMCT) transition. Apart from  $d-d$  transitions, UV-vis-NIR spectrum reveals phenolate ligand-based LMCT transition at around 520 nm, nitrogen donor ligand-based LMCT transition near 340 nm and intra-ligand charge transfer (ILCT) transition nearly at around 270 nm. The solid-state spectrum (Fig. S6) of **1** also exhibits very similar absorption bands with the solution spectrum, suggested that the complex well-preserved its identity upon dissolution.

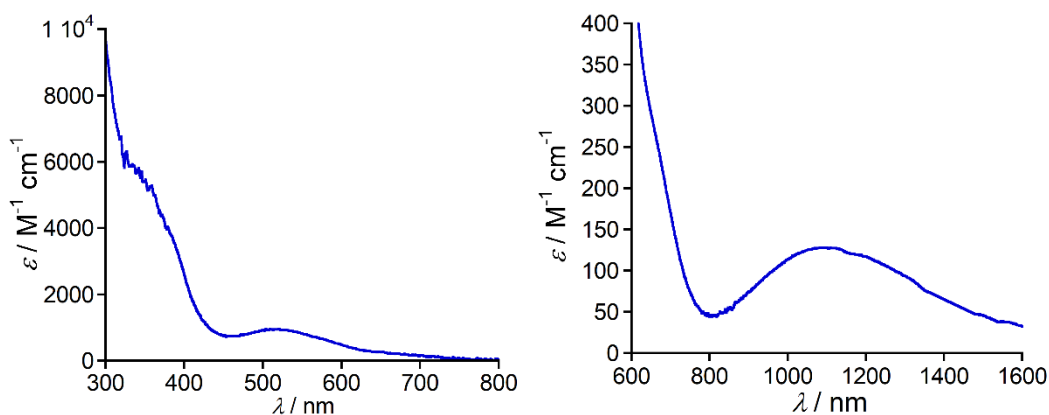

**Fig. S5.** UV-vis-NIR spectra of **1** in MeCN with dilute (left) and concentrated (right) solution at room temperature.



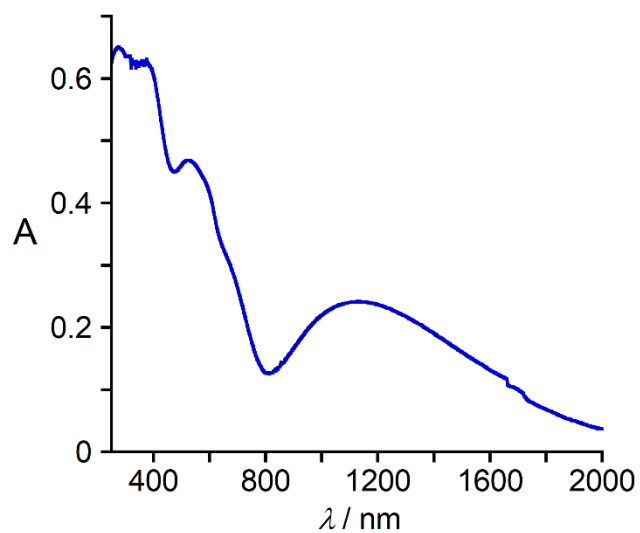

**Fig. S6.** Solid state UV-vis-NIR spectrum of **1** in KBr at room temperature.

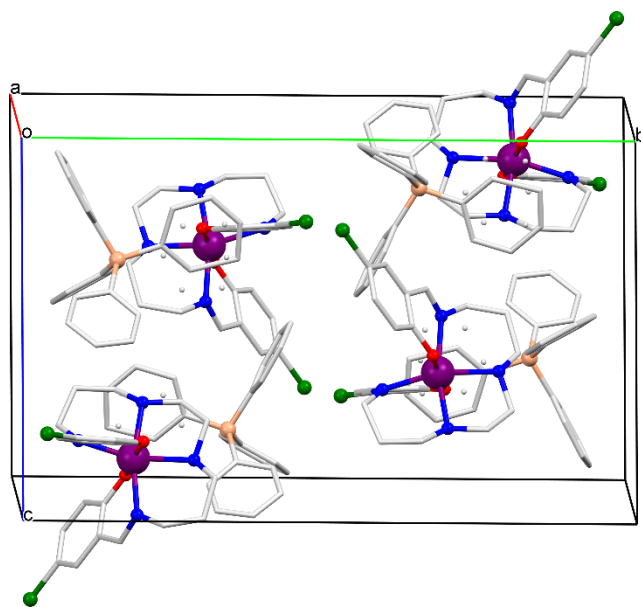

**Fig. S7.** Perspective view of unit cell in **1** at 240 K. Hydrogen atoms are omitted for clarity (Mn: Purple, C: grey, N: blue, O: red, Cl: green).

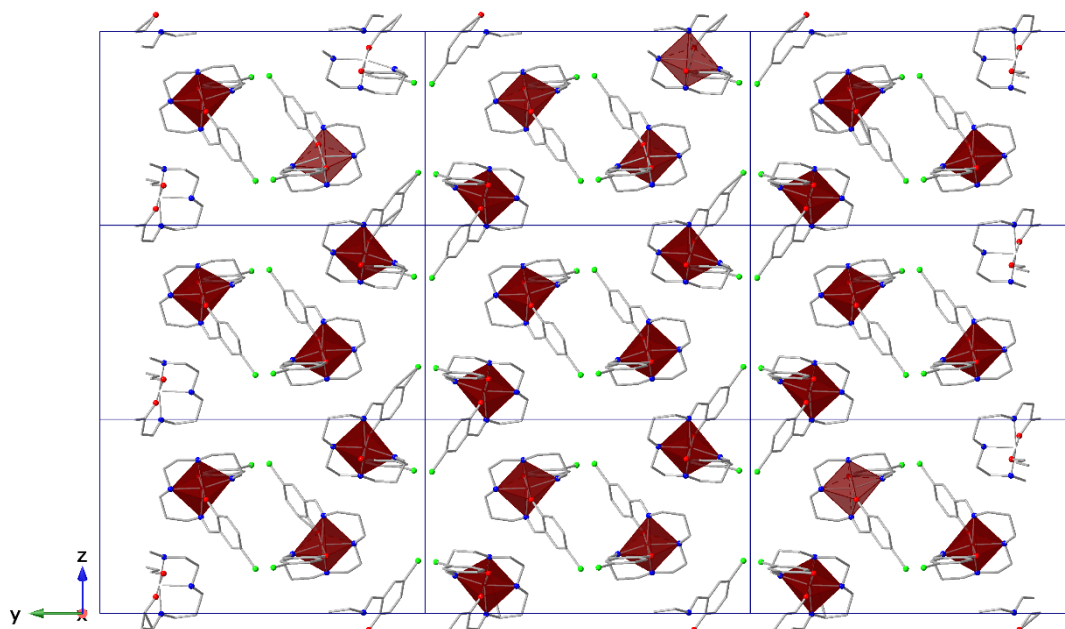

**Fig. S8.** Perspective view of unit cell packing along the  $a$ -axis in **1** at 240 K. Counter-anions and hydrogen atoms are omitted for clarity (Mn(HS), maroon, polyhedral environment).

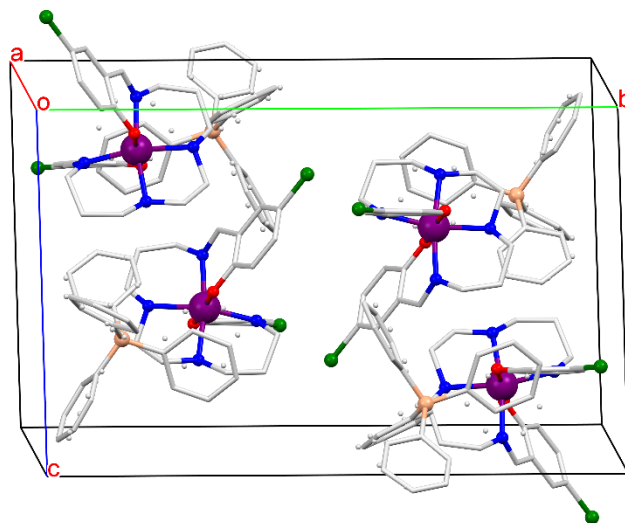

**Fig. S9.** Perspective view of unit cell in **1** at 120 K. Hydrogen atoms are omitted for clarity (Mn: Purple, C: grey, N: blue, O: red, Cl: green).

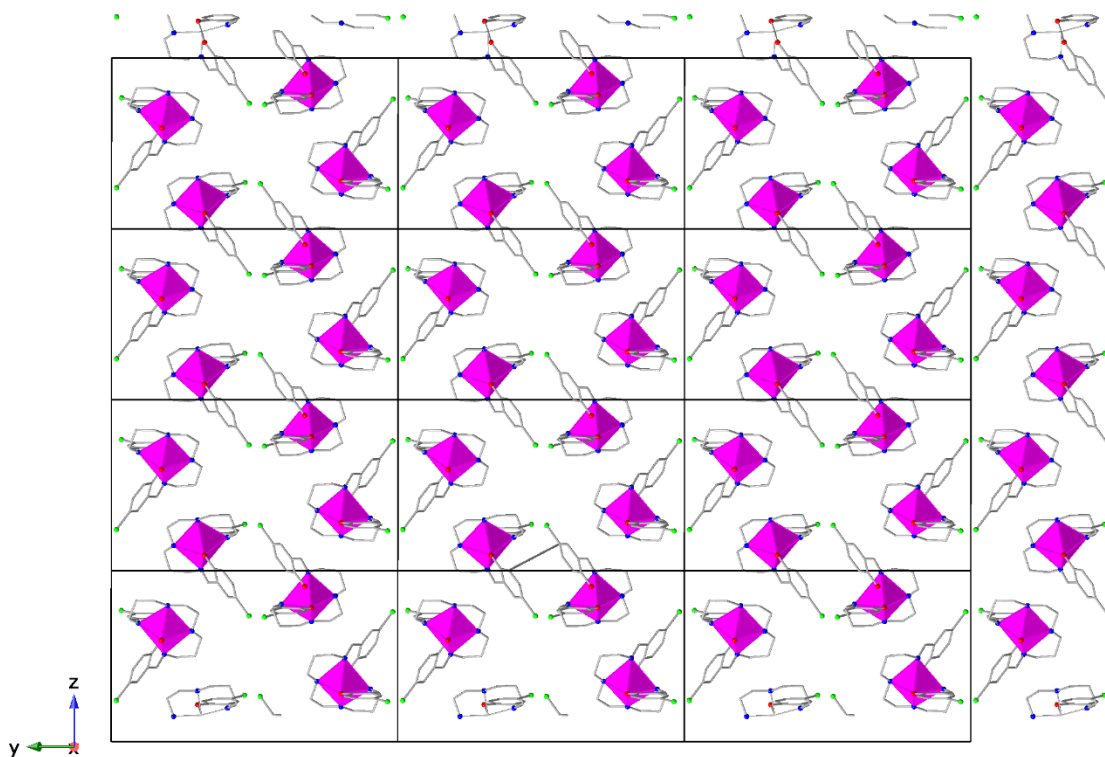

**Fig. S10.** Perspective view of unit cell packing along the  $a$ -axis in **1** at 120 K. Counter-anions and hydrogen atoms are omitted for clarity (Mn(intermediate), violet, polyhedral environment).

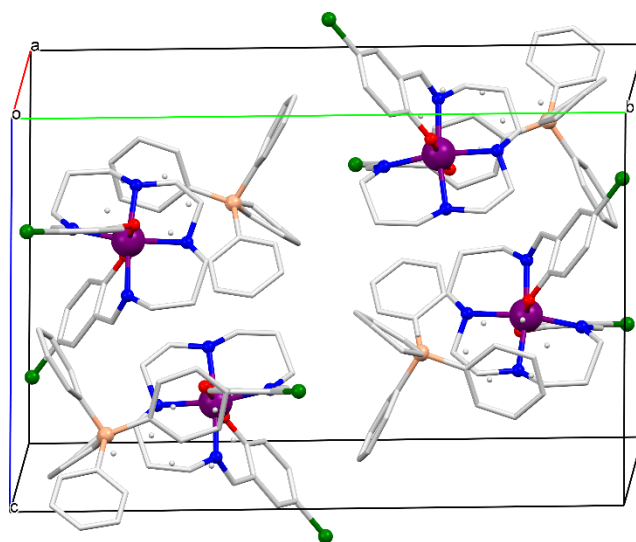

**Fig. S11.** Perspective view of unit cell in **1** at 100 K. Hydrogen atoms are omitted for clarity (Mn: Purple, C: grey, N: blue, O: red, Cl: green).

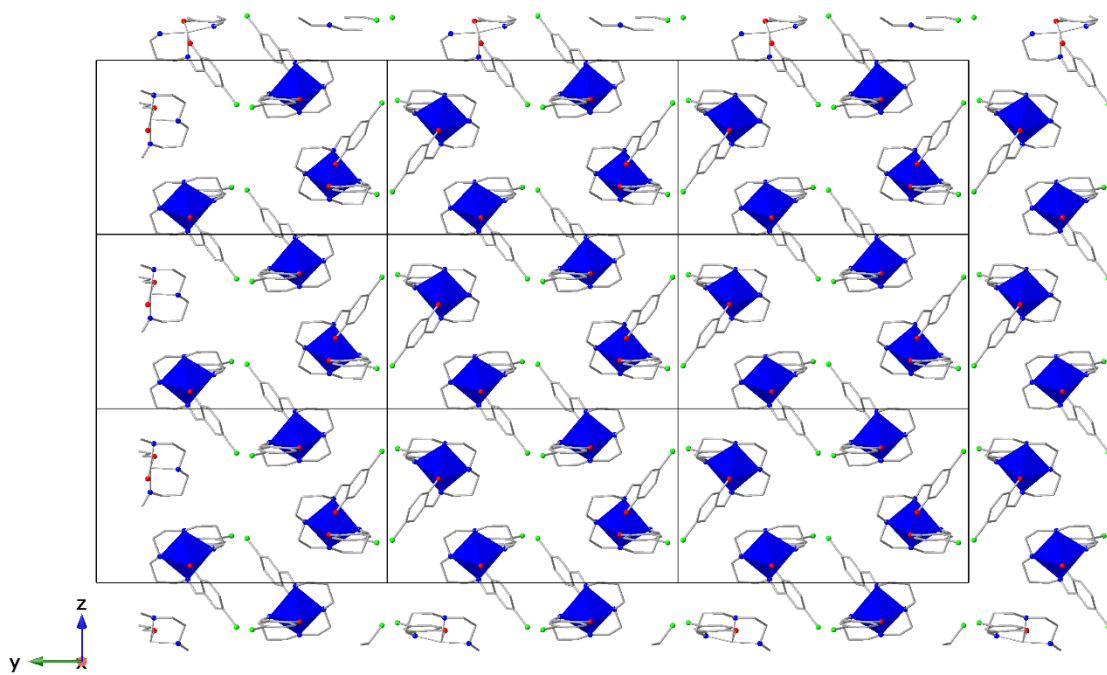

**Fig. S12.** Perspective view of unit cell packing along the  $a$ -axis in **1** at 100 K. Counter-anions and hydrogen atoms are omitted for clarity (Mn(1S), blue, polyhedral environment).

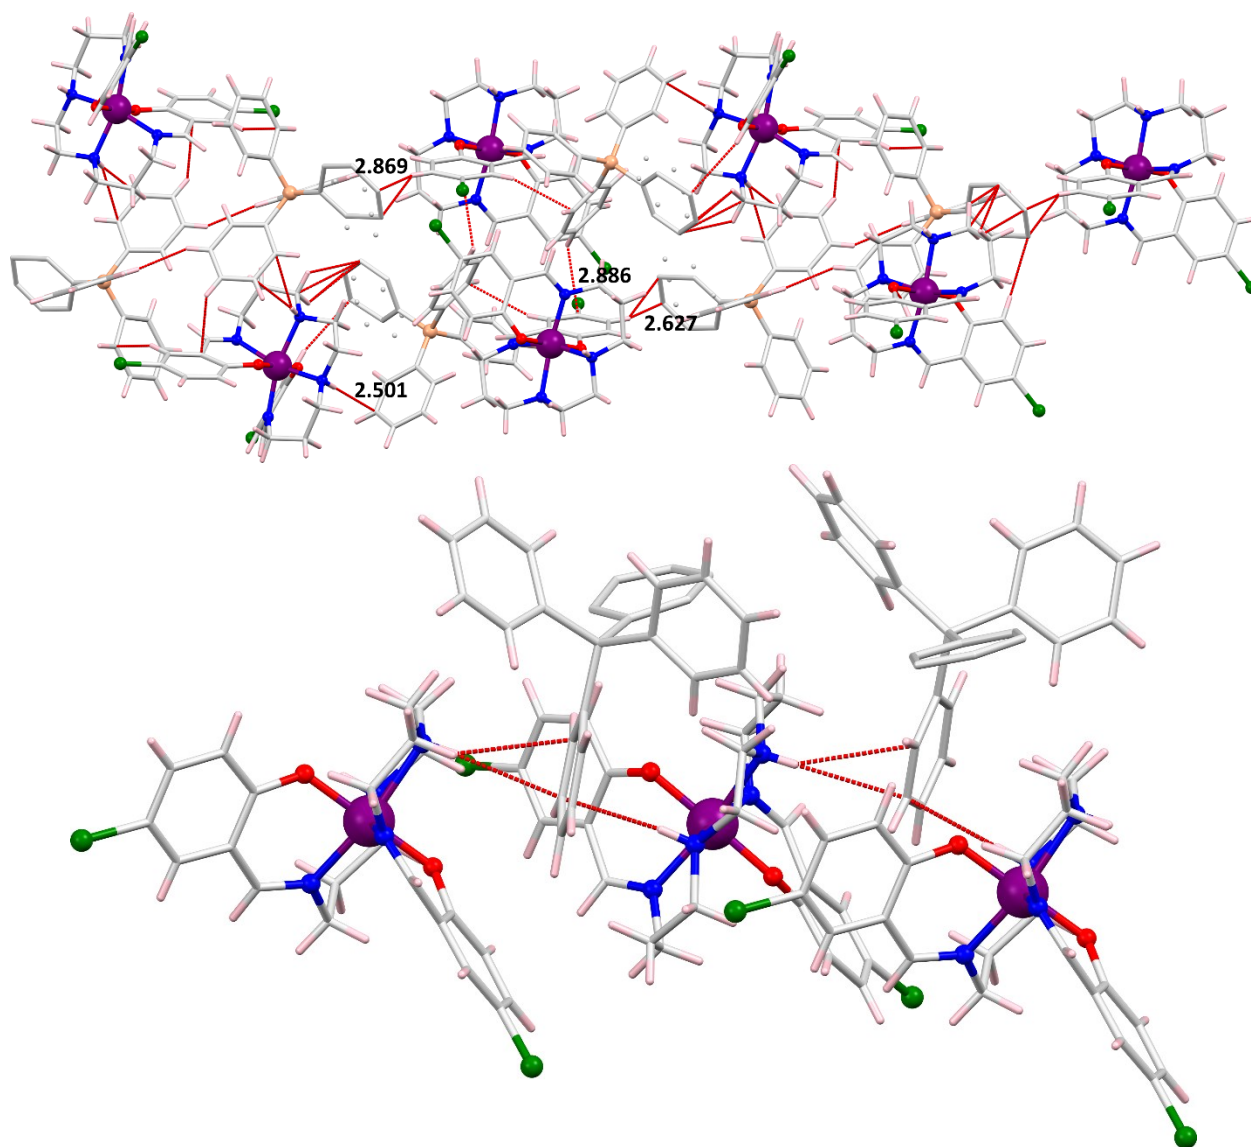

**Fig. S13.** Top: Perspective view of a fragment of the supramolecular structure displaying several weak interactions (red lines) in **1** at 240 K. Bottom: View of N-H...C interactions forming 1D chain in **1** at 240 K.

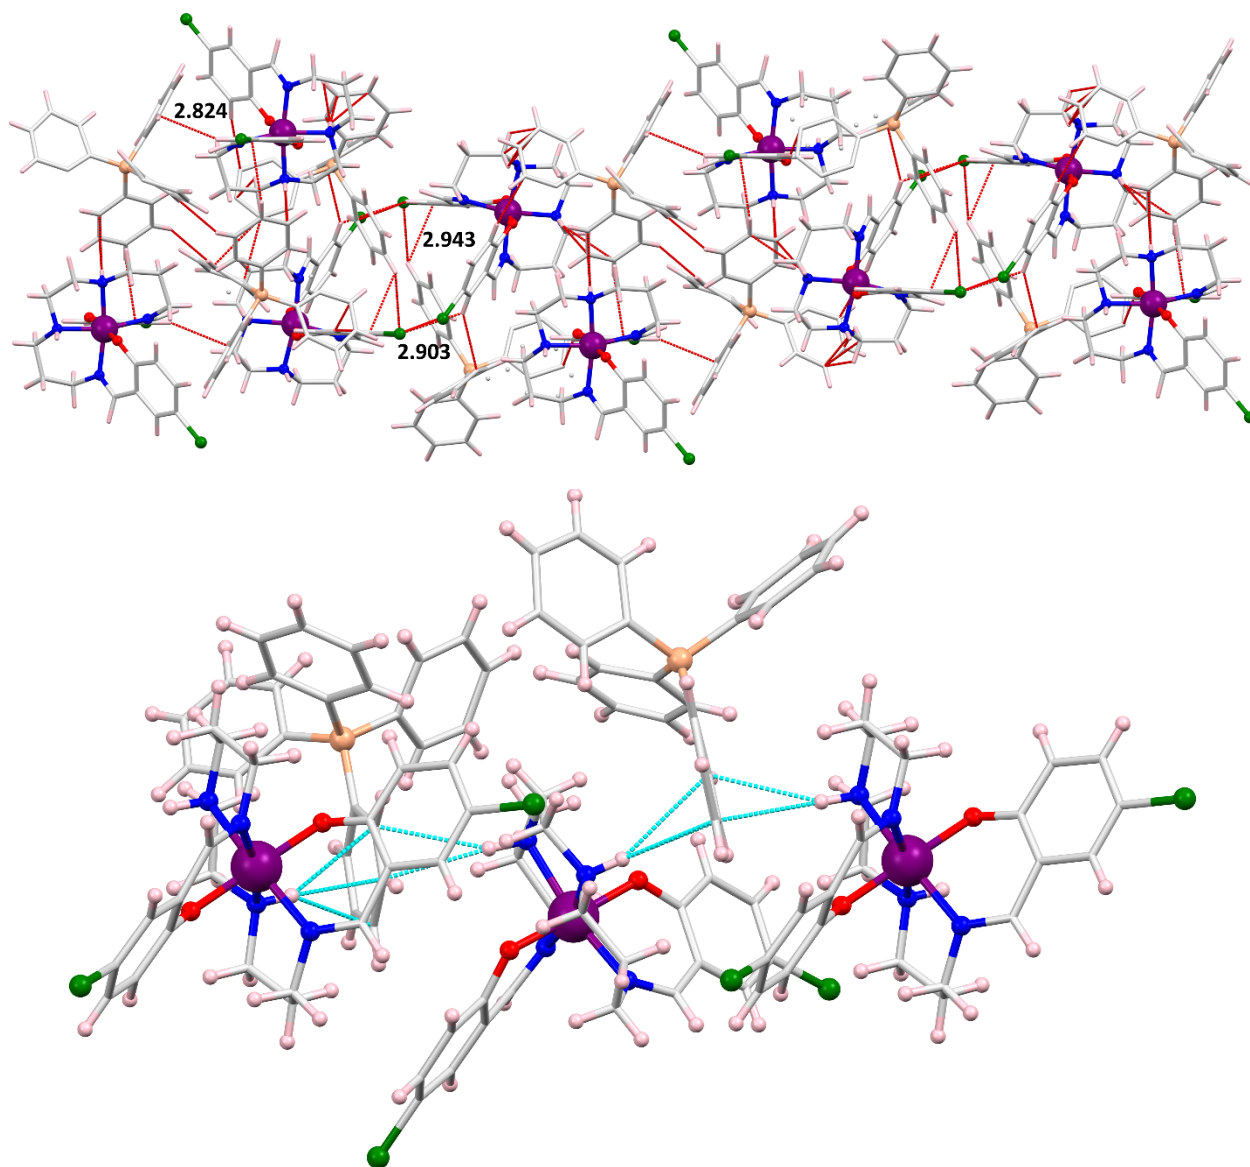

**Fig. S14.** Perspective view of a fragment of the supramolecular structure displaying several weak interactions (red lines) in **1** at 120 K. Bottom: View of N-H...C interactions forming 1D chain in **1** at 120 K.

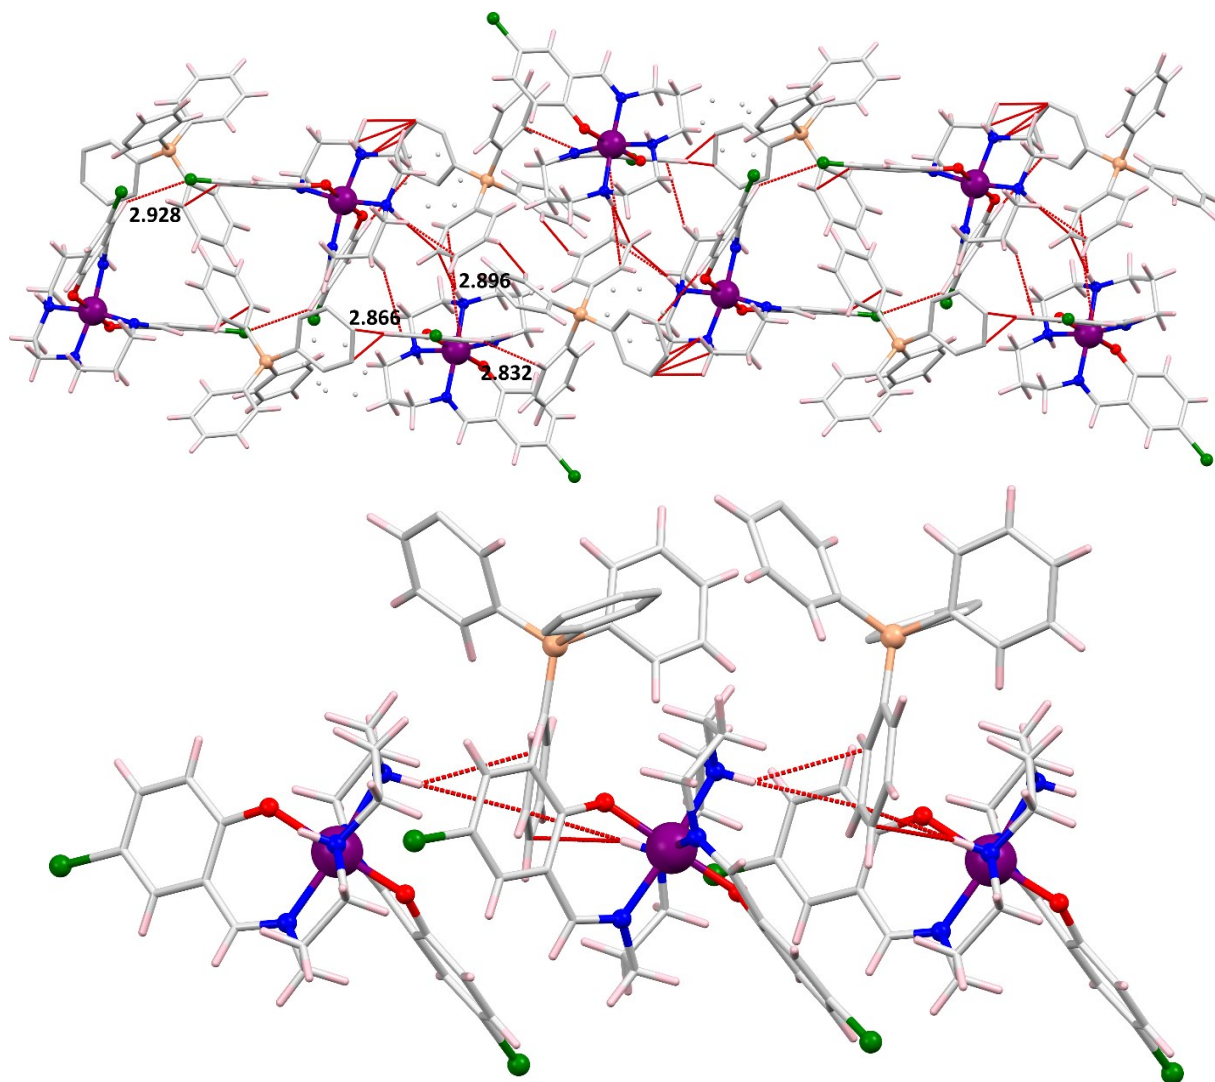

**Fig. S15.** Top: Perspective view of a fragment of the supramolecular structure displaying several weak interactions (red lines) in **1** at 100 K. Bottom: View of N–H···C interactions forming 1D chain in **1** at 100 K.

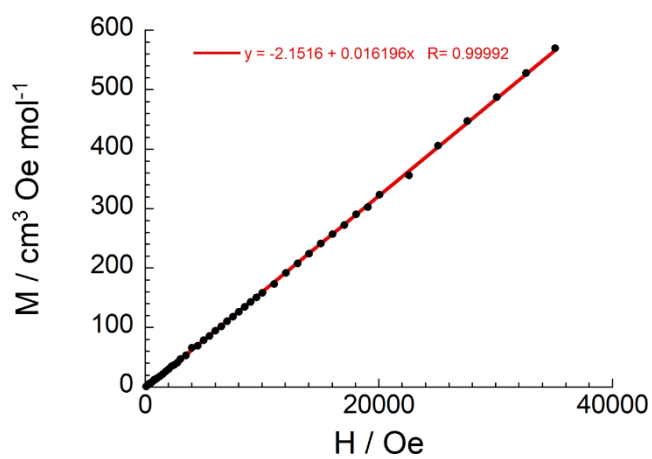

**Fig. S16.** Field dependence of the magnetization as  $M$  vs  $H$  plots for **1** at 100 K. The solid line is best fit.

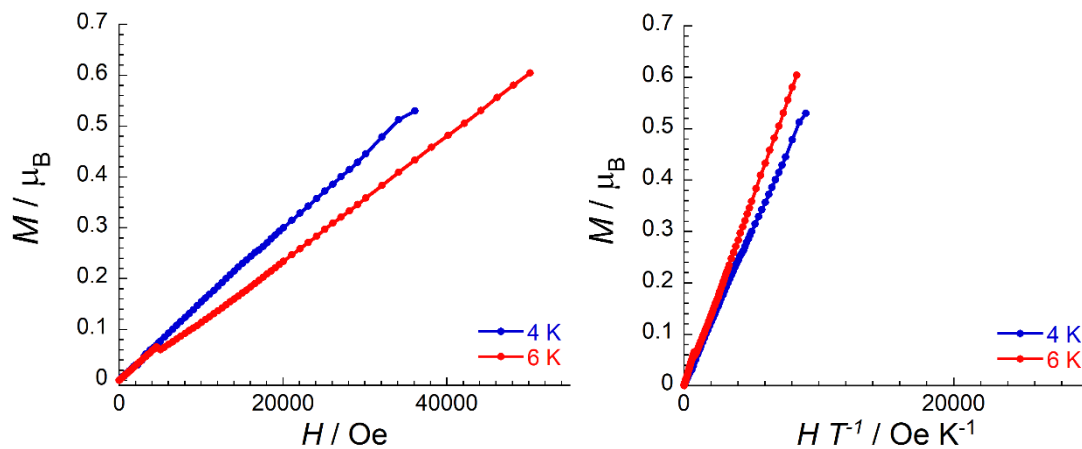

**Fig. S17.** Field dependence of the magnetization as  $M$  vs  $H$  (left) and  $M$  vs  $H/T$  (right) plots for **1** at 4 and 6 K. The solid lines are guide for the eyes.

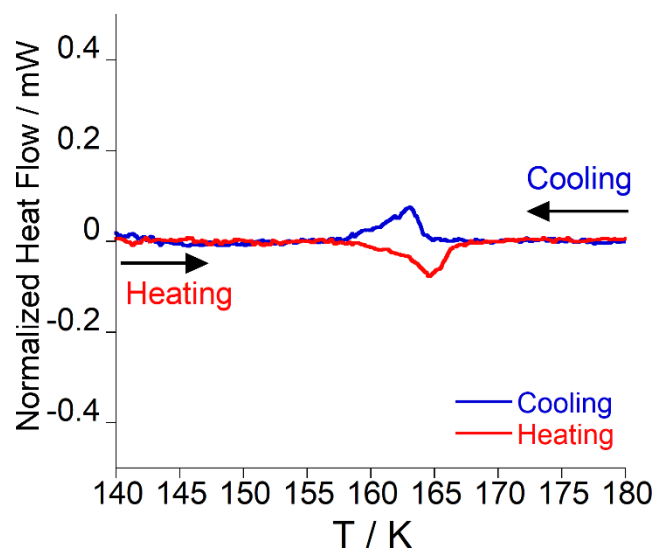

**Fig. S18.** DSC plot of **1** shown between 180 and 140 K at a sweep rate of  $5 \text{ K min}^{-1}$ .

Note: DSC data in the low-temperature region up to 100 K are not available due to the temperature limitation of our instrument.



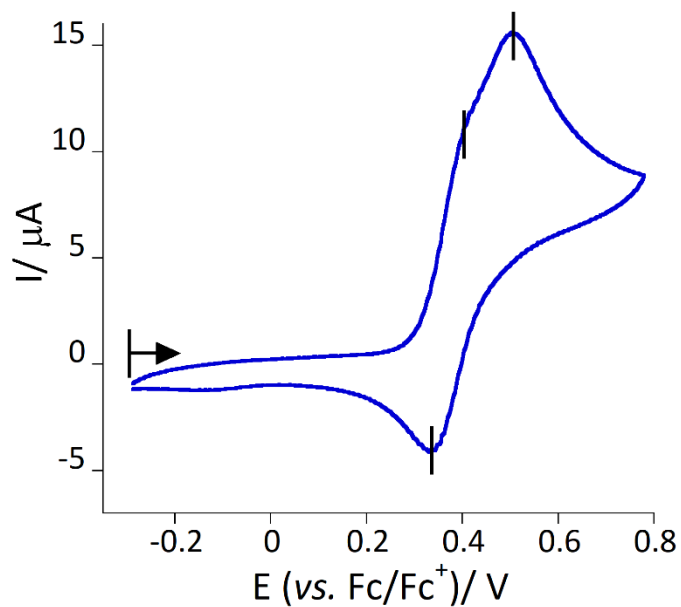

**Fig. S19.** Cyclic voltammogram for oxidation of **1** in 0.2 M ( $t\text{Bu}_4\text{N}$ )PF<sub>6</sub>/MeCN with a scan rate of 100 mV s<sup>-1</sup>. Arrow indicates the open circuit potential with the direction of the potential sweep.

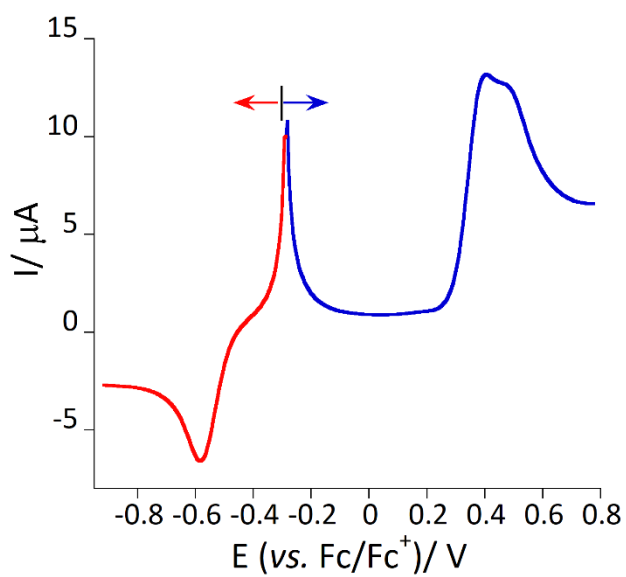

**Fig. S20.** Square wave voltammograms for **1** in 0.2 M ( $t\text{Bu}_4\text{N}$ )PF<sub>6</sub>/MeCN. Arrows indicate the open circuit potential with the direction of the potential sweep.

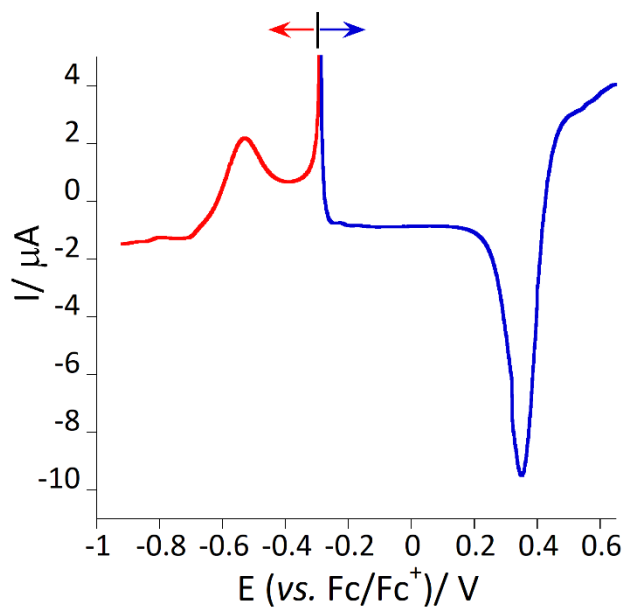

**Fig. S21.** Differential pulse voltammograms for **1** in 0.2 M ( $t\text{Bu}_4\text{N}$ )PF<sub>6</sub>/MeCN. Arrows indicate the open circuit potential with the direction of the potential sweep.

Cyclic voltammograms and square wave voltammogram of NaBPh<sub>4</sub> show an irreversible at around  $E_{pc}=0.51$  V vs Fc/Fc<sup>+</sup> (Fig. S22 and S23).

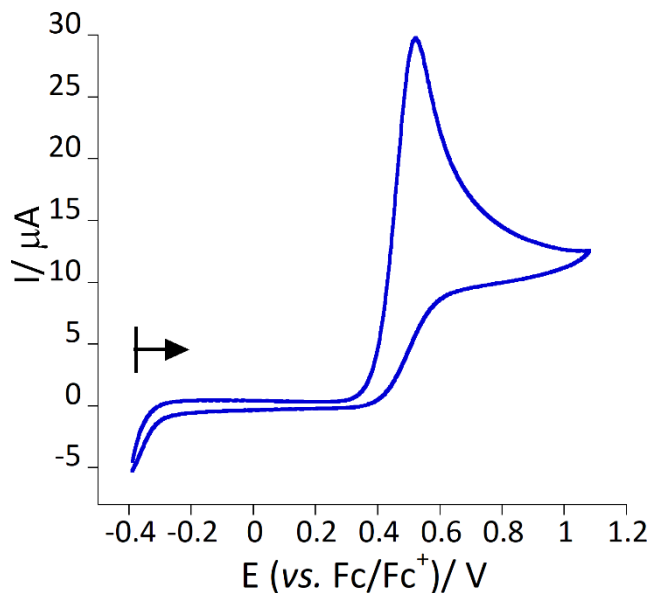

**Fig. S22.** Cyclic voltammogram for oxidation of NaBPh<sub>4</sub> in 0.2 M (nBu<sub>4</sub>N)PF<sub>6</sub>/MeCN with a scan rate of 100 mV s<sup>-1</sup>. Arrow indicates the open circuit potential with the direction of the potential sweep.

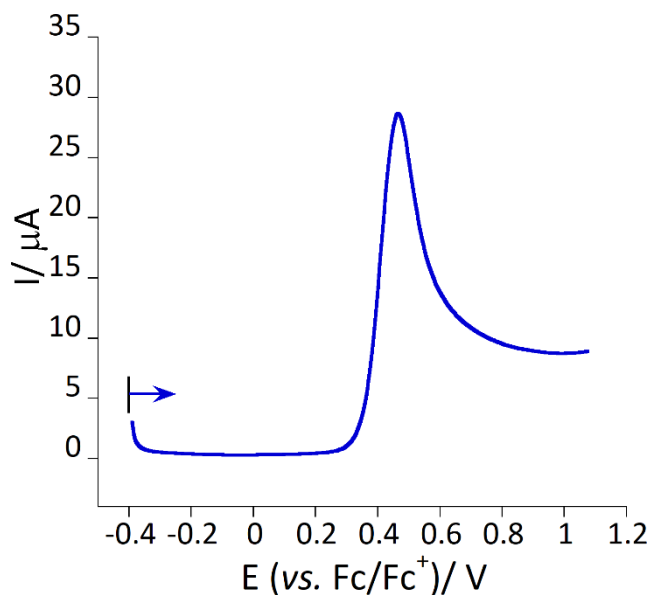

**Fig. S23.** Square wave voltammogram for oxidation of NaBPh<sub>4</sub> in 0.2 M (nBu<sub>4</sub>N)PF<sub>6</sub>/MeCN. Arrow indicates the open circuit potential with the direction of the potential sweep.

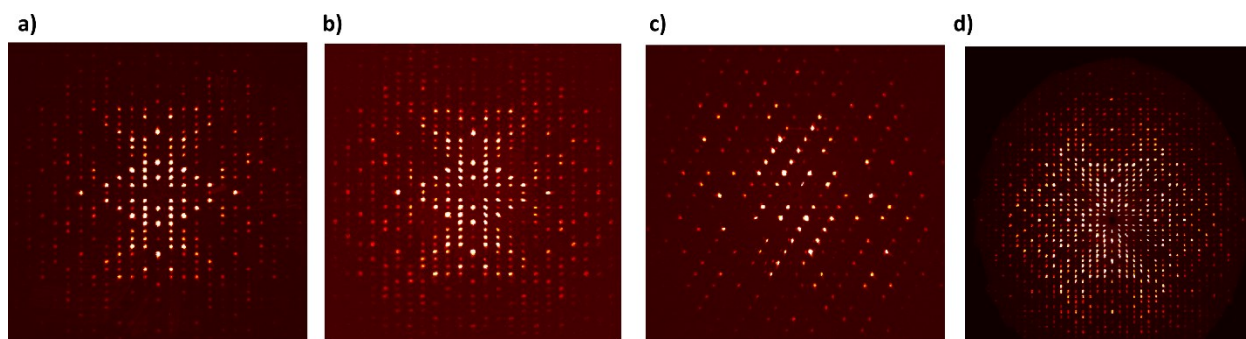

**Fig. S24.** Precession images from **1** in the  $hk0$  at 240 K (monoclinic, a), 120 K (monoclinic, b), 120 K (triclinic, c) and 100 K (monoclinic, d)

**Table****Table S1.** X-ray crystallography data for complex **1**.

| Complex                                              | <b>1</b>                                                                         |                                                                                  |                                                                                  |
|------------------------------------------------------|----------------------------------------------------------------------------------|----------------------------------------------------------------------------------|----------------------------------------------------------------------------------|
| CCDC no                                              | <b>2015524</b>                                                                   | <b>2015521</b>                                                                   | <b>2015472</b>                                                                   |
| temp (K)                                             | 240                                                                              | 120                                                                              | 100                                                                              |
| empirical formula                                    | C <sub>46</sub> H <sub>46</sub> BCl <sub>2</sub> MnN <sub>4</sub> O <sub>2</sub> | C <sub>46</sub> H <sub>46</sub> BCl <sub>2</sub> MnN <sub>4</sub> O <sub>2</sub> | C <sub>46</sub> H <sub>46</sub> BCl <sub>2</sub> MnN <sub>4</sub> O <sub>2</sub> |
| formula wt                                           | 823.52                                                                           | 823.52                                                                           | 823.52                                                                           |
| cryst syst                                           | Monoclinic                                                                       | Monoclinic                                                                       | Monoclinic                                                                       |
| space group                                          | <i>P2<sub>1</sub>/n</i>                                                          | <i>P2<sub>1</sub>/n</i>                                                          | <i>P2<sub>1</sub>/n</i>                                                          |
| <i>a</i> (Å)                                         | 14.3566(10)                                                                      | 14.2615(10)                                                                      | 14.2627(5)                                                                       |
| <i>b</i> (Å)                                         | 21.8039(15)                                                                      | 21.6350(14)                                                                      | 21.6172(8)                                                                       |
| <i>c</i> (Å)                                         | 14.4656(11)                                                                      | 14.4098(10)                                                                      | 14.4837(5)                                                                       |
| $\alpha$ (deg)                                       | 90                                                                               | 90                                                                               | 90                                                                               |
| $\beta$ (deg)                                        | 116.203(3)                                                                       | 116.523(2)                                                                       | 116.711(2)                                                                       |
| $\gamma$ (deg)                                       | 90                                                                               | 90                                                                               | 90                                                                               |
| <i>V</i> , Å <sup>3</sup>                            | 4062.8(5)                                                                        | 3978.2(5)                                                                        | 3989.1(3)                                                                        |
| <i>Z</i>                                             | 4                                                                                | 4                                                                                | 4                                                                                |
| <i>d</i> <sub>calcd</sub> (g cm <sup>-3</sup> )      | 1.346                                                                            | 1.375                                                                            | 1.365                                                                            |
| $\mu$ (mm <sup>-1</sup> )                            | 0.501                                                                            | 0.511                                                                            | 0.510                                                                            |
| <i>F</i> (000)                                       | 1720                                                                             | 1720                                                                             | 1723                                                                             |
| $\theta$ <sub>max</sub> (deg)                        | 25                                                                               | 26.50                                                                            | 30.74                                                                            |
| completeness (%)                                     | 100                                                                              | 100                                                                              | 99.6                                                                             |
| no. of. rflns collected                              | 7143                                                                             | 8238                                                                             | 12377                                                                            |
| no. of. Indep rflns                                  | 4763                                                                             | 5405                                                                             | 10956                                                                            |
| goodness of fit on <i>F</i> <sup>2</sup>             | 1.014                                                                            | 1.128                                                                            | 1.054                                                                            |
| final R indices ( <i>I</i> >2 $\sigma$ ( <i>I</i> )) | R1 = 0.0456<br>wR2 = 0.0940                                                      | R1 = 0.0768<br>wR2 = 0.1560                                                      | R1 = 0.0438<br>wR2 = 0.0937                                                      |
| final R indices (all data)                           | R1 = 0.0840<br>wR2 = 0.1148                                                      | R1 = 0.1117<br>wR2 = 0.1648                                                      | R1 = 0.0505<br>wR2 = 0.0976                                                      |

**Table S2.** Selected bond distances (Å) and bond angles (°) in **1**.

|                 | <b>1</b>     |              |              |
|-----------------|--------------|--------------|--------------|
|                 | <b>240 K</b> | <b>120 K</b> | <b>100 K</b> |
| Mn(1)-N(1)      | 2.168(3)     | 2.111(4)     | 2.0752(14)   |
| Mn(1)-N(2)      | 2.179(3)     | 2.112(4)     | 2.0809(13)   |
| Mn(1)-N(3)      | 2.060(3)     | 2.013(4)     | 2.0010(14)   |
| Mn(1)-N(4)      | 2.095(3)     | 2.034(5)     | 2.0085(14)   |
| Mn(1)-O(1)      | 1.853(2)     | 1.858(3)     | 1.8750(11)   |
| Mn(1)-O(2)      | 1.864(2)     | 1.864(3)     | 1.8667(11)   |
| N(1)-Mn(1)-N(2) | 81.05(11)    | 82.73(17)    | 83.91(5)     |
| N(1)-Mn(1)-N(3) | 164.19(11)   | 167.96(17)   | 169.98(5)    |
| N(1)-Mn(1)-N(4) | 85.90(11)    | 87.91(18)    | 88.96(6)     |
| N(1)-Mn(1)-O(1) | 84.79(10)    | 84.92(16)    | 84.92(5)     |
| N(1)-Mn(1)-O(2) | 93.01(10)    | 91.93(16)    | 91.79(5)     |
| N(2)-Mn(1)-N(3) | 85.06(11)    | 86.89(17)    | 87.80(6)     |
| N(2)-Mn(1)-N(4) | 165.13(11)   | 169.12(18)   | 171.39(6)    |
| N(2)-Mn(1)-O(1) | 93.21(10)    | 91.98(16)    | 91.62(5)     |
| N(2)-Mn(1)-O(2) | 86.85(10)    | 87.10(15)    | 91.65(5)     |
| N(3)-Mn(1)-N(4) | 108.74(10)   | 102.98(18)   | 87.10(5)     |
| N(3)-Mn(1)-O(1) | 88.49(9)     | 89.39(16)    | 89.70(5)     |
| N(3)-Mn(1)-O(2) | 93.74(10)    | 93.61(16)    | 93.42(5)     |
| N(4)-Mn(1)-O(1) | 92.67(10)    | 92.70(16)    | 92.53(5)     |
| N(4)-Mn(1)-O(2) | 86.74(10)    | 87.69(16)    | 88.31(5)     |
| O(1)-Mn(1)-O(2) | 177.76(10)   | 176.81(16)   | 176.59(5)    |

### Continuous Shape Measures (CShM) Analysis:

Continuous Shape Measures (CShM) analysis was carried out to determine the geometry around Mn(III) ion. Based on the values obtained, the idealized polyhedron was matched with the actual coordination spheres. The smallest value is symbolic of proximity of actual coordination sphere and idealized polyhedron.

**Table S3:** CShM analysis data for complex 1.

| Complex | Temp. | Structure |         |              |         |          |
|---------|-------|-----------|---------|--------------|---------|----------|
|         |       | HP - 6    | PPY - 6 | OC - 6       | TPR - 6 | JPPY - 6 |
| 2       | 240 K | 32.110    | 24.624  | <b>1.281</b> | 11.344  | 27.401   |
|         | 120 K | 32.463    | 26.495  | <b>0.691</b> | 12.864  | 29.427   |
|         | 100 K | 32.699    | 27.525  | <b>0.464</b> | 13.643  | 30.577   |

HP – 6: Hexagon (D<sub>6h</sub>), PPY – 6 = Pentagonal pyramid, OC – 6: Octahedron (O<sub>h</sub>), TPR – 6: Trigonal prism (D<sub>3h</sub>), JPPY – 6 = Johnson pentagonal pyramid J<sub>2</sub> (C<sub>5v</sub>);

### Octahedral Distortion Parameters

$\Sigma$  is the sum of the deviation from 90° of the 12 *cis*-angles of the MnN<sub>4</sub>O<sub>2</sub> octahedron;  $\Theta$  is the sum of the deviation from 60° of the 24 trigonal angles of the projection of the MnN<sub>4</sub>O<sub>2</sub> octahedron onto the trigonal faces;  $\zeta$  is the distance distortion parameter, which is the sum of deviation from individual M-N/O bond distances with respect to the mean metal-ligand bond distance.

**Table S4.** Spin crossover behaviors of [Mn(X-sal<sub>2</sub>-323)](BPh<sub>4</sub>) (X = ligand substituent) complexes with associated Mn–N/O bond distances

| Complex X                                                                        | T <sub>1/2</sub> (K) <sup>a</sup>                                                                                | T (K) <sup>b</sup>                                       | Mn–O (Å)                                                                                                                                         | Mn–N (Å)                                                                                                                                                                                                                                                                       | Spin State                                                   | Ref.         |
|----------------------------------------------------------------------------------|------------------------------------------------------------------------------------------------------------------|----------------------------------------------------------|--------------------------------------------------------------------------------------------------------------------------------------------------|--------------------------------------------------------------------------------------------------------------------------------------------------------------------------------------------------------------------------------------------------------------------------------|--------------------------------------------------------------|--------------|
| [Mn(5Cl-sal <sub>2</sub> -323)](BPh <sub>4</sub> )<br><b>X = 5-Cl</b>            | T <sub>1/2</sub> (1) = 168 K<br>T <sub>1/2</sub> (2) = 103 K<br>Two-step and complete                            | 100<br><br>120<br><br>240                                | 1.8753(13)-1.8661(13)<br><br>1.856(4)-1.864(4)<br>1.865(4)-1.861(4)<br><br>1.8650(19)-1.8540(19)                                                 | 2.0742(18)-2.0808(16)<br>2.0005(17)-2.0085(17)<br><br>2.139(5)-2.121(5)<br>2.047(5)-2.022(5)<br>2.098(5)-2.101(5)<br>2.005(5)-2.018(5)<br><br>2.167(3)-2.179(3)<br>2.060(2)-2.095(3)                                                                                           | LS<br><br>HS]:[LS] (1:1)<br><br>HS                           | This work    |
| [Mn(3,5-diBr-sal <sub>2</sub> (323))](BP h <sub>4</sub> )<br><b>X = 3,5-diBr</b> | T <sub>1/2</sub> ↓ = 82<br>T <sub>1/2</sub> ↑ = 90<br>ΔT=8 K hysteretic and abrupt<br>[HS][HS] to [HS][LS] (1:1) | 25<br><br>83<br><br>110<br><br>150<br><br>250<br><br>293 | 1.868(14)-1.908(15)<br><br>1.875(7)-1.892(7)<br><br>1.868(2)-1.879(2)<br><br>1.866(3)-1.879(3)<br><br>1.864(3)-1.879(3)<br><br>1.866(3)-1.876(4) | 2.008(18)-2.08(2),<br>2.058(16)-1.99(2)<br><br>2.002(8)-2.082(9)<br>2.059(8)-2.002(10)<br><br>2.101(3)-2.262(3)<br>2.209(3)-2.094(3)<br><br>2.098(3)-2.259(4)<br>2.206(4)-2.090(4)<br><br>2.102(4)-2.232(5)<br>2.218(5)-2.075(5)<br><br>2.104(4)-2.230(5)<br>2.221(5)-2.079(5) | HS:LS (1:1)<br><br>HS:LS (1:1)<br><br>HS<br><br>HS<br><br>HS | <sup>6</sup> |
| [Mn(3-OEt-Sal-323)](BPh <sub>4</sub> )<br><b>X = 3-OEt</b>                       | HS                                                                                                               | 100                                                      | 1.8687(10)-1.8586(10)                                                                                                                            | 2.0950(11)-2.2479(12)                                                                                                                                                                                                                                                          | HS                                                           | <sup>7</sup> |
| [Mn(3-OMe-sal <sub>2</sub> -323)](BPh <sub>4</sub> )<br><b>X = 3-OMe</b>         | HS                                                                                                               | 100                                                      | 1.8516(18)-1.8829(18)                                                                                                                            | 2.065(2)-2.256(2)                                                                                                                                                                                                                                                              | HS                                                           | <sup>7</sup> |

a: spin crossover temperature; b: structure analyses temperature

**Table S5:** Spin crossover behaviors of [Mn(5Cl-sal<sub>2</sub>-323)](Y) (Y = counteranion) complexes with associated Mn–N/O bond distances

| Complex X                                                                                                 | T <sub>1/2</sub> (K) <sup>a</sup>                                                                                          | T (K) <sup>b</sup>        | Mn–O (Å)                                                                                         | Mn–N (Å)                                                                                                                                                                             | Spin State                         | Ref.         |
|-----------------------------------------------------------------------------------------------------------|----------------------------------------------------------------------------------------------------------------------------|---------------------------|--------------------------------------------------------------------------------------------------|--------------------------------------------------------------------------------------------------------------------------------------------------------------------------------------|------------------------------------|--------------|
| [Mn(5Cl-sal <sub>2</sub> -323)](BPh <sub>4</sub> )<br><b>Y = BPh<sub>4</sub></b>                          | T <sub>1/2</sub> (1) = 168 K<br>T <sub>1/2</sub> (2) = 103 K<br>Two-step and complete                                      | 100<br><br>120<br><br>240 | 1.8753(13)-1.8661(13)<br><br>1.856(4)-1.864(4)<br>1.865(4)-1.861(4)<br><br>1.8650(19)-1.8540(19) | 2.0742(18)-2.0808(16)<br>2.0005(17)-2.0085(17)<br><br>2.139(5)-2.121(5)<br>2.047(5)-2.022(5)<br>2.098(5)-2.101(5)<br>2.005(5)-2.018(5)<br><br>2.167(3)-2.179(3)<br>2.060(2)-2.095(3) | LS<br><br>HS]:[LS] (1:1)<br><br>HS | This work    |
| [Mn(5Cl-sal <sub>2</sub> -323)](TCNQ) <sub>1.5</sub> ·2MeCN <sup>c</sup><br><b>Y = TCNQ<sub>1.5</sub></b> | T <sub>1/2</sub> ↓ = 73, T <sub>1/2</sub> ↑ = 123;<br>ΔT <sub>1/2</sub> = 50 hysteric and abrupt;<br>One step and complete | 100<br><br>220            | 1.872(2)–1.884(2)<br><br>1.871(2)–1.881(2)                                                       | 2.089(3)–2.222(3)<br><br>2.095(2)–2.220(2)                                                                                                                                           | HS<br><br>HS                       | <sup>8</sup> |
| [Mn(5-Cl-Sal-323)](NO <sub>3</sub> )<br><b>Y = NO<sub>3</sub></b>                                         | ~ 200<br>gradual and incomplete                                                                                            | 100<br><br>293            | 1.8690(12)–1.8737(12)<br>1.8726(12)–1.8767(12)<br><br>1.876(2)<br>1.878(2)–1.879(2)              | 2.0695(14)–2.2613(14)<br>2.0628(15)–2.1929 (15)<br><br>2.091(2)–2.244(3)<br>2.100(3)–2.206(3)                                                                                        | HS<br><br>HS                       | <sup>9</sup> |
| [Mn(5-Cl-Sal-323)]ClO <sub>4</sub><br><b>Y = ClO<sub>4</sub></b>                                          | >281<br>gradual and incomplete                                                                                             | 100<br><br>260            | 1.8608(13)<br>1.8787(13)<br><br>1.8641(16)–1.8641(16)<br>1.8726(15)                              | 2.1071(16)–2.2201(17)<br>1.9826(17)–2.0484 (18)<br><br>2.1055(19)–2.219(2)                                                                                                           | [HS]:[LS] (1:1)<br><br>HS          | <sup>9</sup> |

a: spin crossover temperature; b: structure analyses temperature; c: TCNQ = 7,7,8,8,-tetracyanoquinodimethane



Appendix: Check cif files for complex 1.

**Temperature: 240 K**

## checkCIF/PLATON report

Structure factors have been supplied for datablock(s) 240K

THIS REPORT IS FOR GUIDANCE ONLY. IF USED AS PART OF A REVIEW PROCEDURE FOR PUBLICATION, IT SHOULD NOT REPLACE THE EXPERTISE OF AN EXPERIENCED CRYSTALLOGRAPHIC REFEREE.

No syntax errors found. CIF dictionary Interpreting this report

### Datablock: 240K

---

|                        |                                                     |                                             |
|------------------------|-----------------------------------------------------|---------------------------------------------|
| Bond precision:        | C-C = 0.0053 A                                      | Wavelength=0.71073                          |
| Cell:                  | a=14.3566(10)      b=21.8039(15)      c=14.4656(11) | alpha=90      beta=116.203(3)      gamma=90 |
| Temperature:           | 240 K                                               |                                             |
|                        | Calculated                                          | Reported                                    |
| Volume                 | 4062.8(5)                                           | 4062.8(5)                                   |
| Space group            | P 21/n                                              | P 1 21/n 1                                  |
| Hall group             | -P 2yn                                              | -P 2yn                                      |
| Moiety formula         | C24 H20 B, C22 H26 Cl2 Mn N4 O2                     | C22 H26 Cl2 Mn N4 O2, C24 H20 B             |
| Sum formula            | C46 H46 B Cl2 Mn N4 O2                              | C46 H46 B Cl2 Mn N4 O2                      |
| Mr                     | 823.52                                              | 823.52                                      |
| Dx, g cm <sup>-3</sup> | 1.346                                               | 1.346                                       |
| Z                      | 4                                                   | 4                                           |
| Mu (mm <sup>-1</sup> ) | 0.501                                               | 0.501                                       |
| F000                   | 1720.0                                              | 1720.0                                      |
| F000'                  | 1723.06                                             |                                             |
| h, k, lmax             | 17, 25, 17                                          | 17, 25, 17                                  |
| Nref                   | 7143                                                | 7143                                        |
| Tmin, Tmax             | 0.897, 0.937                                        | 0.651, 0.746                                |
| Tmin'                  | 0.810                                               |                                             |

Correction method= # Reported T Limits: Tmin=0.651 Tmax=0.746  
AbsCorr = MULTI-SCAN

Data completeness= 1.000      Theta(max)= 24.999

R(reflections)= 0.0456( 4763)      wR2(reflections)= 0.1148( 7143)

S = 1.014      Npar= 738

---

The following ALERTS were generated. Each ALERT has the format

**test-name\_ALERT\_alert-type\_alert-level.**

Click on the hyperlinks for more details of the test.

---

**Alert level C**

RINTA01\_ALERT\_3\_C The value of Rint is greater than 0.12  
Rint given 0.128  
PLAT088\_ALERT\_3\_C Poor Data / Parameter Ratio ..... 9.68 Note  
PLAT332\_ALERT\_2\_C Large Phenyl C-C Range C29 -C34B . 0.18 Ang.  
PLAT420\_ALERT\_2\_C D-H Without Acceptor N1 --H1 . Please Check  
PLAT420\_ALERT\_2\_C D-H Without Acceptor N2 --H2 . Please Check

---

**Alert level G**

PLAT003\_ALERT\_2\_G Number of Uiso or Uij Restrained non-H Atoms ... 10 Report  
PLAT020\_ALERT\_3\_G The Value of Rint is Greater Than 0.12 ..... 0.128 Report  
PLAT042\_ALERT\_1\_G Calc. and Reported MoietyFormula Strings Differ Please Check  
PLAT164\_ALERT\_4\_G Nr. of Refined C-H H-Atoms in Heavy-Atom Struct. 2 Note  
PLAT178\_ALERT\_4\_G The CIF-Embedded .res File Contains SIMU Records 1 Report  
PLAT186\_ALERT\_4\_G The CIF-Embedded .res File Contains ISOR Records 3 Report  
PLAT187\_ALERT\_4\_G The CIF-Embedded .res File Contains RIGU Records 2 Report  
PLAT301\_ALERT\_3\_G Main Residue Disorder .....(Resd 1 ) 96% Note  
PLAT793\_ALERT\_4\_G Model has Chirality at N1 (Centro SPGR) R Verify  
PLAT793\_ALERT\_4\_G Model has Chirality at N2 (Centro SPGR) R Verify  
PLAT794\_ALERT\_5\_G Tentative Bond Valency for Mn1 (I) . 0.85 Info  
PLAT811\_ALERT\_5\_G No ADDSYM Analysis: Too Many Excluded Atoms .... ! Info  
PLAT860\_ALERT\_3\_G Number of Least-Squares Restraints ..... 423 Note  
PLAT883\_ALERT\_1\_G No Info/Value for \_atom\_sites\_solution\_primary . Please Do !  
PLAT909\_ALERT\_3\_G Percentage of I>2sig(I) Data at Theta(Max) Still 37% Note  
PLAT978\_ALERT\_2\_G Number C-C Bonds with Positive Residual Density. 1 Info

---

0 **ALERT level A** = Most likely a serious problem - resolve or explain  
0 **ALERT level B** = A potentially serious problem, consider carefully  
5 **ALERT level C** = Check. Ensure it is not caused by an omission or oversight  
16 **ALERT level G** = General information/check it is not something unexpected

2 ALERT type 1 CIF construction/syntax error, inconsistent or missing data  
5 ALERT type 2 Indicator that the structure model may be wrong or deficient  
6 ALERT type 3 Indicator that the structure quality may be low  
6 ALERT type 4 Improvement, methodology, query or suggestion  
2 ALERT type 5 Informative message, check

---

It is advisable to attempt to resolve as many as possible of the alerts in all categories. Often the minor alerts point to easily fixed oversights, errors and omissions in your CIF or refinement strategy, so attention to these fine details can be worthwhile. In order to resolve some of the more serious problems it may be necessary to carry out additional measurements or structure refinements. However, the purpose of your study may justify the reported deviations and the more serious of these should normally be commented upon in the discussion or experimental section of a paper or in the "special\_details" fields of the CIF. checkCIF was carefully designed to identify outliers and unusual parameters, but every test has its limitations and alerts that are not important in a particular case may appear. Conversely, the absence of alerts does not guarantee there are no aspects of the results needing attention. It is up to the individual to critically assess their own results and, if necessary, seek expert advice.

### Publication of your CIF in IUCr journals

A basic structural check has been run on your CIF. These basic checks will be run on all CIFs submitted for publication in IUCr journals (*Acta Crystallographica*, *Journal of Applied Crystallography*, *Journal of Synchrotron Radiation*); however, if you intend to submit to *Acta Crystallographica Section C* or *E* or *IUCrData*, you should make sure that full publication checks are run on the final version of your CIF prior to submission.

### Publication of your CIF in other journals

Please refer to the *Notes for Authors* of the relevant journal for any special instructions relating to CIF submission.

---

**PLATON version of 18/09/2020; check.def file version of 20/08/2020**

Datablock 240K - ellipsoid plot

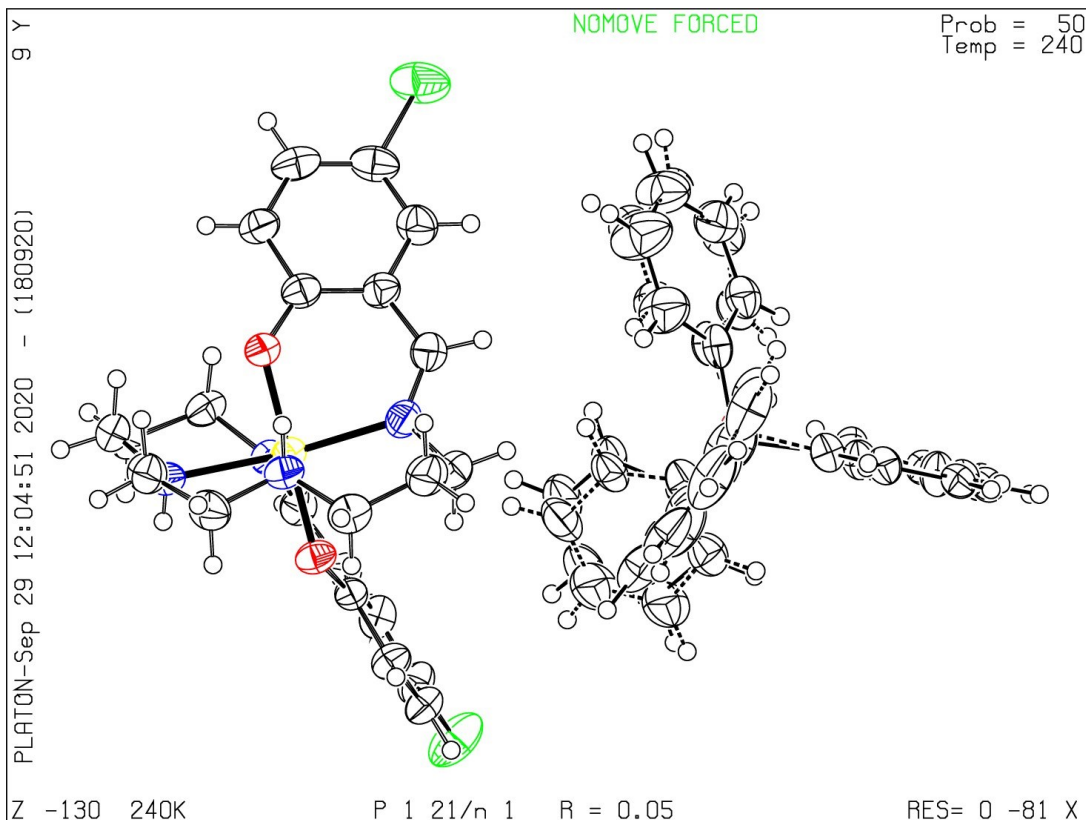

**Temperature: 120K**

## checkCIF/PLATON report

Structure factors have been supplied for datablock(s) 120K

THIS REPORT IS FOR GUIDANCE ONLY. IF USED AS PART OF A REVIEW PROCEDURE FOR PUBLICATION, IT SHOULD NOT REPLACE THE EXPERTISE OF AN EXPERIENCED CRYSTALLOGRAPHIC REFEREE.

No syntax errors found. CIF dictionary Interpreting this report

### Datablock: 120K

---

|                        |                                                     |                                             |
|------------------------|-----------------------------------------------------|---------------------------------------------|
| Bond precision:        | C-C = 0.0082 A                                      | Wavelength=0.71073                          |
| Cell:                  | a=14.2615(10)      b=21.6350(14)      c=14.4098(10) | alpha=90      beta=116.523(2)      gamma=90 |
| Temperature:           | 120 K                                               |                                             |
|                        | Calculated                                          | Reported                                    |
| Volume                 | 3978.2(5)                                           | 3978.2(5)                                   |
| Space group            | P 21/n                                              | P 1 21/n 1                                  |
| Hall group             | -P 2yn                                              | -P 2yn                                      |
| Moiety formula         | C22 H26 Cl2 Mn N4 O2, C24<br>H20 B                  | C22 H26 Cl2 Mn N4 O2,<br>1(C24 H20 B1)      |
| Sum formula            | C46 H46 B Cl2 Mn N4 O2                              | C46 H46 B Cl2 Mn N4 O2                      |
| Mr                     | 823.52                                              | 823.52                                      |
| Dx, g cm <sup>-3</sup> | 1.375                                               | 1.375                                       |
| Z                      | 4                                                   | 4                                           |
| Mu (mm <sup>-1</sup> ) | 0.511                                               | 0.511                                       |
| F000                   | 1720.0                                              | 1720.0                                      |
| F000'                  | 1723.06                                             |                                             |
| h, k, lmax             | 17, 27, 18                                          | 17, 27, 18                                  |
| Nref                   | 8237                                                | 8238                                        |
| Tmin, Tmax             | 0.895, 0.936                                        | 0.651, 0.746                                |
| Tmin'                  | 0.807                                               |                                             |

Correction method= # Reported T Limits: Tmin=0.651 Tmax=0.746  
AbsCorr = MULTI-SCAN

Data completeness= 1.000      Theta(max)= 26.499

R(reflections)= 0.0768( 5405)      wR2(reflections)= 0.1648( 8238)

S = 1.128      Npar= 731

---

The following ALERTS were generated. Each ALERT has the format

**test-name\_ALERT\_alert-type\_alert-level.**

Click on the hyperlinks for more details of the test.

---

**Alert level C**

RINTA01\_ALERT\_3\_C The value of Rint is greater than 0.12  
Rint given 0.136  
PLAT020\_ALERT\_3\_C The Value of Rint is Greater Than 0.12 ..... 0.136 Report  
PLAT332\_ALERT\_2\_C Large Phenyl C-C Range C29A -C34A . 0.18 Ang.  
PLAT332\_ALERT\_2\_C Large Phenyl C-C Range C35A -C40A . 0.17 Ang.  
PLAT332\_ALERT\_2\_C Large Phenyl C-C Range C29B -C34B . 0.25 Ang.  
PLAT332\_ALERT\_2\_C Large Phenyl C-C Range C35B -C40B . 0.22 Ang.  
PLAT341\_ALERT\_3\_C Low Bond Precision on C-C Bonds ..... 0.00816 Ang.  
PLAT420\_ALERT\_2\_C D-H Without Acceptor N1 --H1 . Please Check  
PLAT420\_ALERT\_2\_C D-H Without Acceptor N2 --H2 . Please Check  
PLAT906\_ALERT\_3\_C Large K Value in the Analysis of Variance ..... 11.869 Check  
PLAT906\_ALERT\_3\_C Large K Value in the Analysis of Variance ..... 2.657 Check  
PLAT977\_ALERT\_2\_C Check Negative Difference Density on H25A -0.31 eA-3

---

**Alert level G**

PLAT003\_ALERT\_2\_G Number of Uiso or Uij Restrained non-H Atoms ... 3 Report  
PLAT007\_ALERT\_5\_G Number of Unrefined Donor-H Atoms ..... 2 Report  
PLAT042\_ALERT\_1\_G Calc. and Reported MoietyFormula Strings Differ Please Check  
PLAT083\_ALERT\_2\_G SHELXL Second Parameter in WGHT Unusually Large 18.12 Why ?  
PLAT186\_ALERT\_4\_G The CIF-Embedded .res File Contains ISOR Records 1 Report  
PLAT187\_ALERT\_4\_G The CIF-Embedded .res File Contains RIGU Records 3 Report  
PLAT232\_ALERT\_2\_G Hirshfeld Test Diff (M-X) Mn1 --N4 . 6.0 s.u.  
PLAT302\_ALERT\_4\_G Anion/Solvent/Minor-Residue Disorder (Resd 2 ) 100% Note  
PLAT302\_ALERT\_4\_G Anion/Solvent/Minor-Residue Disorder (Resd 3 ) 100% Note  
PLAT304\_ALERT\_4\_G Non-Integer Number of Atoms in ..... (Resd 2 ) 26.69 Check  
PLAT304\_ALERT\_4\_G Non-Integer Number of Atoms in ..... (Resd 3 ) 18.31 Check  
PLAT793\_ALERT\_4\_G Model has Chirality at N1 (Centro SPGR) R Verify  
PLAT793\_ALERT\_4\_G Model has Chirality at N2 (Centro SPGR) R Verify  
PLAT794\_ALERT\_5\_G Tentative Bond Valency for Mn1 (I) . 0.91 Info  
PLAT811\_ALERT\_5\_G No ADDSYM Analysis: Too Many Excluded Atoms .... ! Info  
PLAT860\_ALERT\_3\_G Number of Least-Squares Restraints ..... 414 Note  
PLAT978\_ALERT\_2\_G Number C-C Bonds with Positive Residual Density. 1 Info

---

0 **ALERT level A** = Most likely a serious problem - resolve or explain  
0 **ALERT level B** = A potentially serious problem, consider carefully  
12 **ALERT level C** = Check. Ensure it is not caused by an omission or oversight  
17 **ALERT level G** = General information/check it is not something unexpected

1 ALERT type 1 CIF construction/syntax error, inconsistent or missing data  
11 ALERT type 2 Indicator that the structure model may be wrong or deficient  
6 ALERT type 3 Indicator that the structure quality may be low  
8 ALERT type 4 Improvement, methodology, query or suggestion  
3 ALERT type 5 Informative message, check

---

---

It is advisable to attempt to resolve as many as possible of the alerts in all categories. Often the minor alerts point to easily fixed oversights, errors and omissions in your CIF or refinement strategy, so attention to these fine details can be worthwhile. In order to resolve some of the more serious problems it may be necessary to carry out additional measurements or structure refinements. However, the purpose of your study may justify the reported deviations and the more serious of these should normally be commented upon in the discussion or experimental section of a paper or in the "special\_details" fields of the CIF. checkCIF was carefully designed to identify outliers and unusual parameters, but every test has its limitations and alerts that are not important in a particular case may appear. Conversely, the absence of alerts does not guarantee there are no aspects of the results needing attention. It is up to the individual to critically assess their own results and, if necessary, seek expert advice.

### Publication of your CIF in IUCr journals

A basic structural check has been run on your CIF. These basic checks will be run on all CIFs submitted for publication in IUCr journals (*Acta Crystallographica*, *Journal of Applied Crystallography*, *Journal of Synchrotron Radiation*); however, if you intend to submit to *Acta Crystallographica Section C* or *E* or *IUCrData*, you should make sure that full publication checks are run on the final version of your CIF prior to submission.

### Publication of your CIF in other journals

Please refer to the *Notes for Authors* of the relevant journal for any special instructions relating to CIF submission.

---

## PLATON version of 18/09/2020; check.def file version of 20/08/2020

Datablock 120K - ellipsoid plot

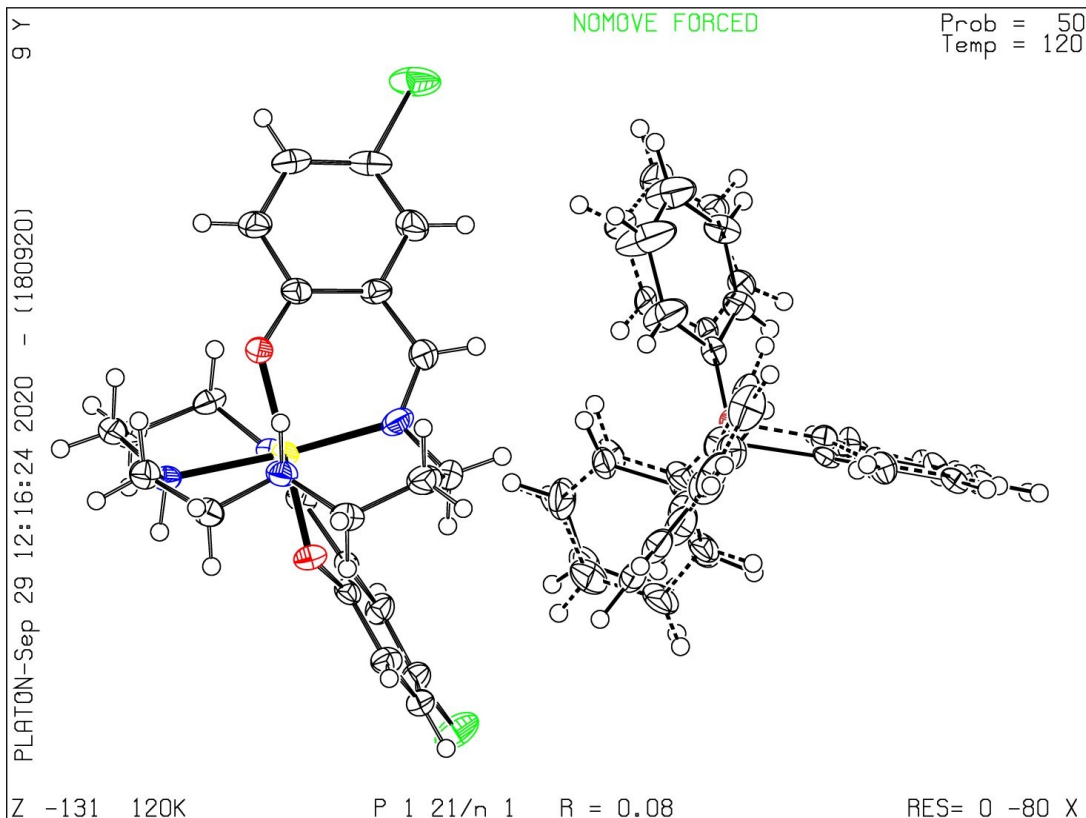

Temperature: 100 K

## checkCIF/PLATON report

Structure factors have been supplied for datablock(s) 100K

THIS REPORT IS FOR GUIDANCE ONLY. IF USED AS PART OF A REVIEW PROCEDURE FOR PUBLICATION, IT SHOULD NOT REPLACE THE EXPERTISE OF AN EXPERIENCED CRYSTALLOGRAPHIC REFEREE.

No syntax errors found. CIF dictionary Interpreting this report

### Datablock: 100K

---

Bond precision: C-C = 0.0024 A

Wavelength=0.71073

Cell: a=14.2627 (5) b=21.6172 (8) c=14.4837 (5)  
alpha=90 beta=116.711 (2) gamma=90  
Temperature: 100 K

|                | Calculated                         | Reported                           |
|----------------|------------------------------------|------------------------------------|
| Volume         | 3989.1 (3)                         | 3989.1 (3)                         |
| Space group    | P 21/n                             | P 1 21/n 1                         |
| Hall group     | -P 2yn                             | -P 2ybc (x-                        |
| Moiety formula | C22 H26 Cl2 Mn N4 O2, C24<br>H20 B | C22 H26 Cl2 Mn N4 O2, C24<br>H20 B |
| Sum formula    | C46 H46 B Cl2 Mn N4 O2             | C46 H46 B Cl2 Mn N4 O2             |
| Mr             | 823.52                             | 823.57                             |
| Dx, g cm-3     | 1.371                              | 1.365                              |
| Z              | 4                                  | 4                                  |
| Mu (mm-1)      | 0.510                              | 0.510                              |
| F000           | 1720.0                             | 1723.2                             |
| F000'          | 1723.06                            |                                    |
| h, k, lmax     | 20, 31, 20                         | 20, 30, 20                         |
| Nref           | 12432                              | 12377                              |
| Tmin, Tmax     | 0.896, 0.936                       | 0.651, 0.746                       |
| Tmin'          | 0.807                              |                                    |

Correction method= # Reported T Limits: Tmin=0.651 Tmax=0.746  
AbsCorr = MULTI-SCAN

Data completeness= 0.996

Theta(max)= 30.740

R(reflections)= 0.0438 ( 10956)

wR2(reflections)= 0.0976 ( 12377)

S = 1.054

Npar= 747

---

The following ALERTS were generated. Each ALERT has the format

**test-name\_ALERT\_alert-type\_alert-level.**

Click on the hyperlinks for more details of the test.

---

### ● Alert level C

|                   |                                           |                           |         |              |
|-------------------|-------------------------------------------|---------------------------|---------|--------------|
| PLAT126_ALERT_1_C | Error in or Uninterpretable Hall Symbol   | .....                     | -P 2YBC | (X-Z,Y       |
| PLAT221_ALERT_2_C | Solv./Anion Resd 2                        | C Ueq(max)/Ueq(min) Range | 5.1     | Ratio        |
| PLAT223_ALERT_4_C | Solv./Anion Resd 2                        | H Ueq(max)/Ueq(min) Range | 5.1     | Ratio        |
| PLAT420_ALERT_2_C | D-H Without Acceptor                      | N1 --H1                   | .       | Please Check |
| PLAT420_ALERT_2_C | D-H Without Acceptor                      | N2 --H2                   | .       | Please Check |
| PLAT906_ALERT_3_C | Large K Value in the Analysis of Variance | .....                     | 2.807   | Check        |

---

### ● Alert level G

|                   |                                                  |                                 |        |              |
|-------------------|--------------------------------------------------|---------------------------------|--------|--------------|
| PLAT003_ALERT_2_G | Number of Uiso or Uij Restrained non-H Atoms     | ...                             | 50     | Report       |
| PLAT068_ALERT_1_G | Reported F000 Differs from Calcd (or Missing)    | ...                             |        | Please Check |
| PLAT083_ALERT_2_G | SHELXL Second Parameter in WGHT                  | Unusually Large                 | 5.57   | Why ?        |
| PLAT164_ALERT_4_G | Nr. of Refined C-H H-Atoms in Heavy-Atom Struct. |                                 | 2      | Note         |
| PLAT186_ALERT_4_G | The CIF-Embedded .res File Contains ISOR Records |                                 | 2      | Report       |
| PLAT187_ALERT_4_G | The CIF-Embedded .res File Contains RIGU Records |                                 | 2      | Report       |
| PLAT232_ALERT_2_G | Hirshfeld Test Diff (M-X)                        | Mn1 --N1                        | 9.0    | s.u.         |
| PLAT232_ALERT_2_G | Hirshfeld Test Diff (M-X)                        | Mn1 --N4                        | 10.3   | s.u.         |
| PLAT302_ALERT_4_G | Anion/Solvent/Minor-Residue Disorder (Resd 2)    | )                               | 100%   | Note         |
| PLAT302_ALERT_4_G | Anion/Solvent/Minor-Residue Disorder (Resd 3)    | )                               | 100%   | Note         |
| PLAT304_ALERT_4_G | Non-Integer Number of Atoms in                   | ..... (Resd 2)                  | 30.78  | Check        |
| PLAT304_ALERT_4_G | Non-Integer Number of Atoms in                   | ..... (Resd 3)                  | 14.22  | Check        |
| PLAT432_ALERT_2_G | Short Inter X...Y Contact                        | C11 ..C26B                      | 3.25   | Ang.         |
|                   |                                                  | -x,-y,1-z =                     | 3_556  | Check        |
| PLAT769_ALERT_4_G | CIF Embedded explicitly supplied scattering data |                                 |        | Please Note  |
| PLAT793_ALERT_4_G | Model has Chirality at N1                        | (Centro SPGR)                   |        | R Verify     |
| PLAT793_ALERT_4_G | Model has Chirality at N2                        | (Centro SPGR)                   |        | R Verify     |
| PLAT794_ALERT_5_G | Tentative Bond Valency for Mn1                   | (I)                             | 0.93   | Info         |
| PLAT811_ALERT_5_G | No ADDSYM Analysis: Too Many Excluded Atoms      | ....                            |        | ! Info       |
| PLAT860_ALERT_3_G | Number of Least-Squares Restraints               | .....                           | 444    | Note         |
| PLAT883_ALERT_1_G | No Info/Value for _atom_sites_solution_primary   | .                               |        | Please Do !  |
| PLAT912_ALERT_4_G | Missing # of FCF Reflections Above STh/L=        | 0.600                           | 50     | Note         |
| PLAT960_ALERT_3_G | Number of Intensities with I < - 2*sig(I)        | ...                             | 5      | Check        |
| PLAT978_ALERT_2_G | Number C-C Bonds with Positive Residual Density. |                                 | 19     | Info         |
| PLAT982_ALERT_1_G | The Mn-f' =                                      | 0.3478 Deviates from IT-value = | 0.3368 | Check        |
| PLAT983_ALERT_1_G | The Cl-f" =                                      | 0.1603 Deviates from IT-Value = | 0.1585 | Check        |
| PLAT983_ALERT_1_G | The Mn-f" =                                      | 0.7326 Deviates from IT-Value = | 0.7283 | Check        |

---

0 **ALERT level A** = Most likely a serious problem - resolve or explain  
0 **ALERT level B** = A potentially serious problem, consider carefully  
6 **ALERT level C** = Check. Ensure it is not caused by an omission or oversight  
26 **ALERT level G** = General information/check it is not something unexpected

6 ALERT type 1 CIF construction/syntax error, inconsistent or missing data  
9 ALERT type 2 Indicator that the structure model may be wrong or deficient  
3 ALERT type 3 Indicator that the structure quality may be low  
12 ALERT type 4 Improvement, methodology, query or suggestion  
2 ALERT type 5 Informative message, check

---



It is advisable to attempt to resolve as many as possible of the alerts in all categories. Often the minor alerts point to easily fixed oversights, errors and omissions in your CIF or refinement strategy, so attention to these fine details can be worthwhile. In order to resolve some of the more serious problems it may be necessary to carry out additional measurements or structure refinements. However, the purpose of your study may justify the reported deviations and the more serious of these should normally be commented upon in the discussion or experimental section of a paper or in the "special\_details" fields of the CIF. checkCIF was carefully designed to identify outliers and unusual parameters, but every test has its limitations and alerts that are not important in a particular case may appear. Conversely, the absence of alerts does not guarantee there are no aspects of the results needing attention. It is up to the individual to critically assess their own results and, if necessary, seek expert advice.

### **Publication of your CIF in IUCr journals**

A basic structural check has been run on your CIF. These basic checks will be run on all CIFs submitted for publication in IUCr journals (*Acta Crystallographica*, *Journal of Applied Crystallography*, *Journal of Synchrotron Radiation*); however, if you intend to submit to *Acta Crystallographica Section C* or *E* or *IUCrData*, you should make sure that full publication checks are run on the final version of your CIF prior to submission.

### **Publication of your CIF in other journals**

Please refer to the *Notes for Authors* of the relevant journal for any special instructions relating to CIF submission.

---

**PLATON version of 18/09/2020; check.def file version of 20/08/2020**

Datablock 100K - ellipsoid plot

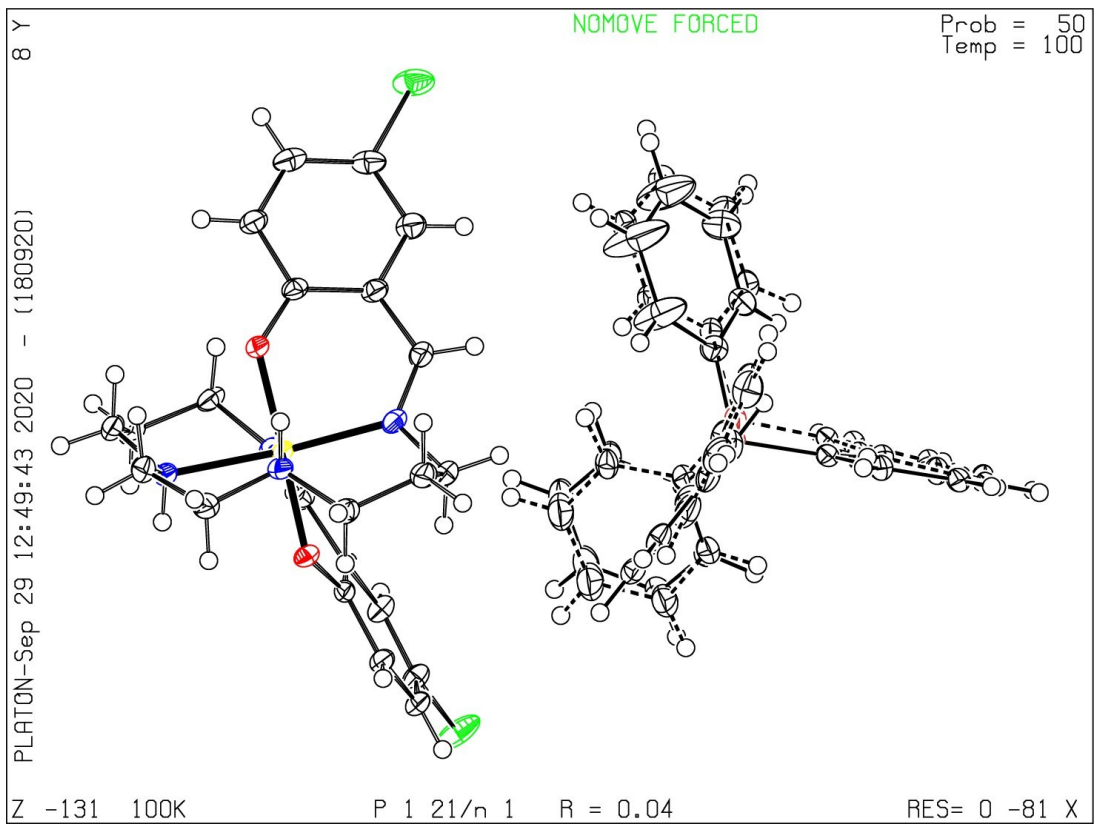

## Reference

1. T. Degen, M. Sadki, E. Bron, U. König and G. Nénert, *Powder Diffr.*, 2014, **29**, S13-S18.
2. G. M. Sheldrick, SADABS Version 2.03, Bruker Analytical X-Ray Systems, Madison, WI, USA, 2000.
3. G. M. Sheldrick, *Acta Crystallogr A Found Adv*, 2015, **71**, 3-8.
4. G. Sheldrick, *Acta Crystallogr., Sect. C: Struct. Chem*, 2015, **71**, 3-8.
5. O. V. Dolomanov, L. J. Bourhis, R. J. Gildea, J. A. K. Howard and H. Puschmann, *J. Appl. Crystallogr.*, 2009, **42**, 339-341.
6. V. B. Jakobsen, E. Trzop, L. C. Gavin, E. Dobbelaar, S. Chikara, X. Ding, K. Esien, H. Muller-Bunz, S. Felton, V. S. Zapf, E. Collet, M. A. Carpenter and G. G. Morgan, *Angew. Chem. Int. Ed.*, 2020, **59**, 13305-13312.
7. B. Gildea, M. M. Harris, L. C. Gavin, C. A. Murray, Y. Ortin, H. Muller-Bunz, C. J. Harding, Y. Lan, A. K. Powell and G. G. Morgan, *Inorg. Chem.*, 2014, **53**, 6022-6033.
8. A. V. Kazakova, A. V. Tiunova, D. V. Korchagin, G. V. Shilov, E. B. Yagubskii, V. N. Zverev, S. C. Yang, J. Y. Lin, J. F. Lee, O. V. Maximova and A. N. Vasiliev, *Chem. Eur. J.*, 2019, **25**, 10204-10213.
9. B. Gildea, L. C. Gavin, C. A. Murray, H. Müller-Bunz, C. J. Harding and G. G. Morgan, *Supramol. Chem.*, 2012, **24**, 641-653.
